# Supplementary material for: Temporal processing and context dependency in Caenorhabditis elegans response to mechanosensation
Source: eLife journal article supplement (doi:10.7554/elife.36419), 2018-06-25
Supplement: supp [file elife-36419-supp-v1.zip]

Archive with 24 entries (24 files):
- elife_poa_e36419_Figure_4_figure_supplement_2.pdf
- elife_poa_e36419_Figure_1_figure_supplement_2.pdf
- elife_poa_e36419_Figure_1_figure_supplement_5_video_1.mp4
- elife_poa_e36419_Figure_8_source_data_1.xlsx
- elife_poa_e36419_Figure_2_figure_supplement_1.pdf
- elife_poa_e36419_Figure_4_figure_supplement_1.pdf
- elife_poa_e36419_Figure_6_figure_supplement_2.pdf
- elife_poa_e36419_Figure_3_figure_supplement_4.pdf
- elife_poa_e36419_Figure_5_figure_supplement_1.pdf
- elife_poa_e36419_Figure_3_figure_supplement_5.pdf
- elife_poa_e36419_Figure_2_figure_supplement_4.pdf
- elife_poa_e36419_Figure_1_figure_supplement_1.pdf
- elife_poa_e36419_Figure_3_figure_supplement_2.pdf
- elife_poa_e36419_Figure_2_figure_supplement_2.pdf
- elife_poa_e36419_Figure_8_figure_supplement_2.pdf
- elife_poa_e36419_Figure_8_source_data_2.xlsx
- elife_poa_e36419_Figure_3_figure_supplement_1.pdf
- elife_poa_e36419_Figure_6_figure_supplement_1.pdf
- elife_poa_e36419_Figure_2_figure_supplement_3.pdf
- elife_poa_e36419_Transparent_Reporting_File.docx
- elife_poa_e36419_Figure_1_figure_supplement_4_video_1.mp4
- elife_poa_e36419_Figure_1_figure_supplement_3_video_1.mp4
- elife_poa_e36419_Figure_3_figure_supplement_3.pdf
- elife_poa_e36419_Figure_8_figure_supplement_1.pdf
