# Supplementary material for: Temporal processing and context dependency in Caenorhabditis elegans response to mechanosensation
Source: eLife journal article supplement (doi:10.7554/elife.36419), 2018-06-25
Supplement: supp [file elife-36419-supp-v1.zip › elife_poa_e36419_Figure_2_figure_supplement_2.pdf]

a.

Tap

(40,409 stimulus-animal presentations)

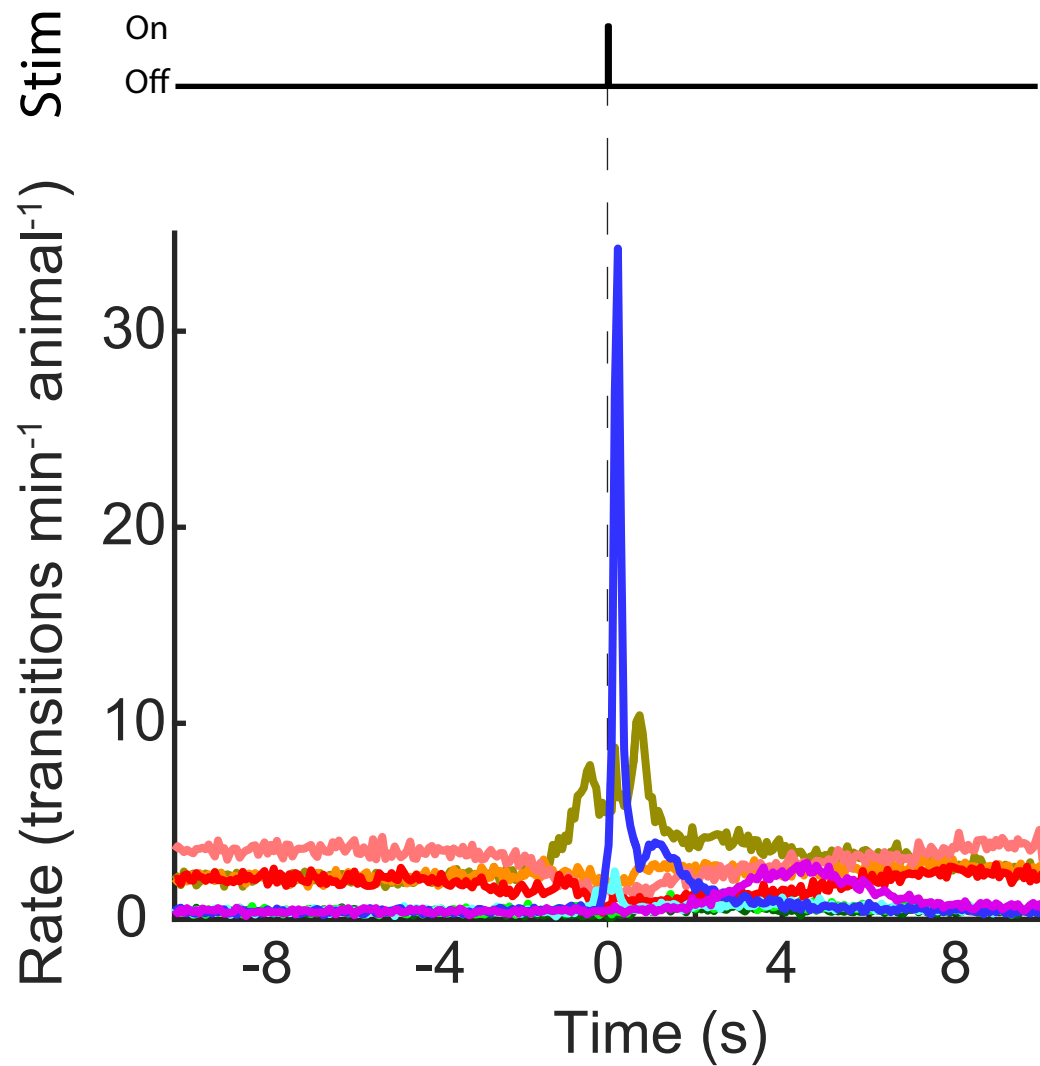

b.

Light

(2,444 stimulus-animal presentations)

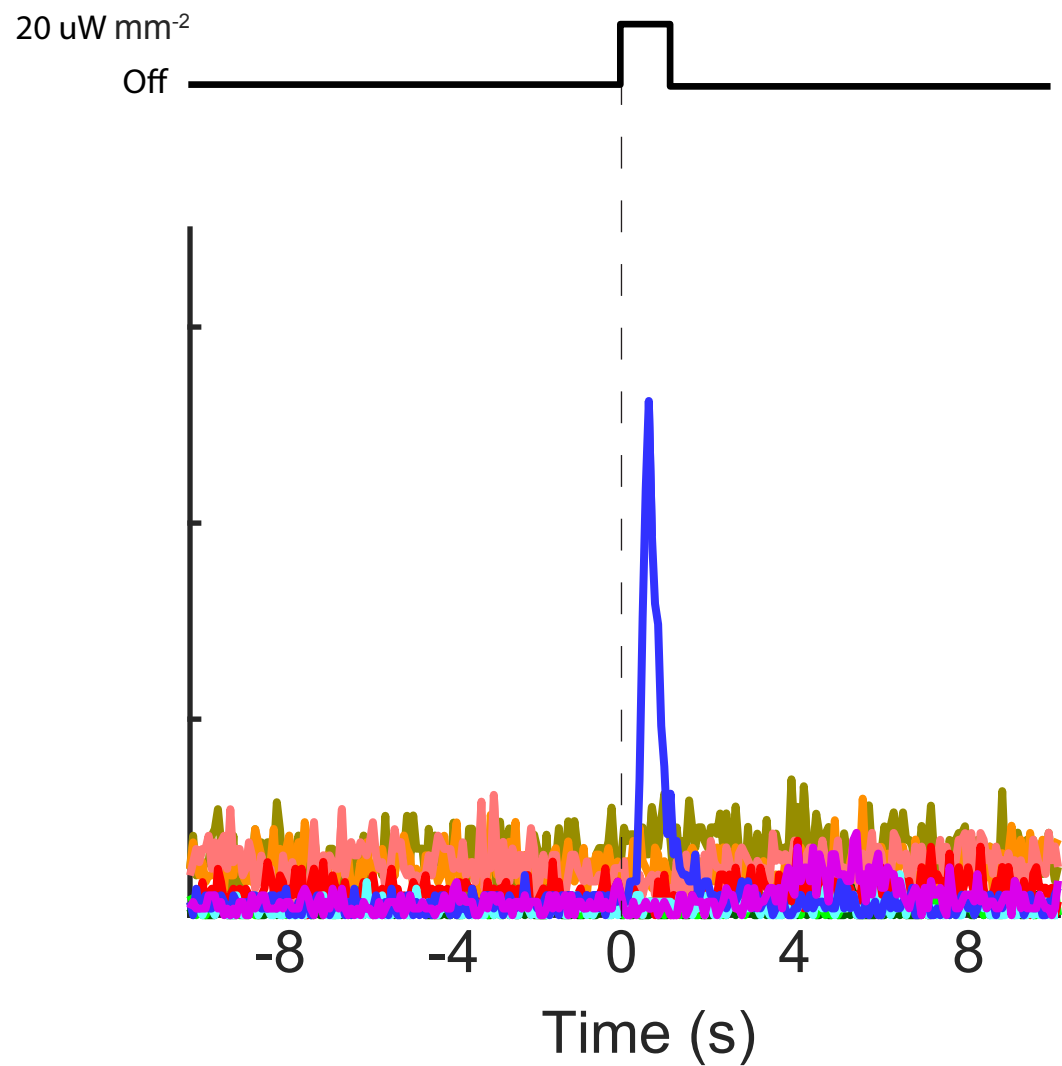

|           |           |              |
|-----------|-----------|--------------|
| Forward 1 | Forward 4 | Slow Reverse |
| Forward 2 | Forward 5 | Fast Reverse |
| Forward 3 | Forward 6 | Turns        |
