# Supplementary material for: Temporal processing and context dependency in Caenorhabditis elegans response to mechanosensation
Source: eLife journal article supplement (doi:10.7554/elife.36419), 2018-06-25

# Light Control (- ATR)

Transition Into

Forward 1   Forward 2   Forward 3   Forward 4   Forward 5   Forward 6   Slow Reverse   Fast Reverse   Turns

Transition From

Stimulus Intensity ( $\mu\text{W mm}^{-2}$ )

27  
23  
-10   10  
Time (s)

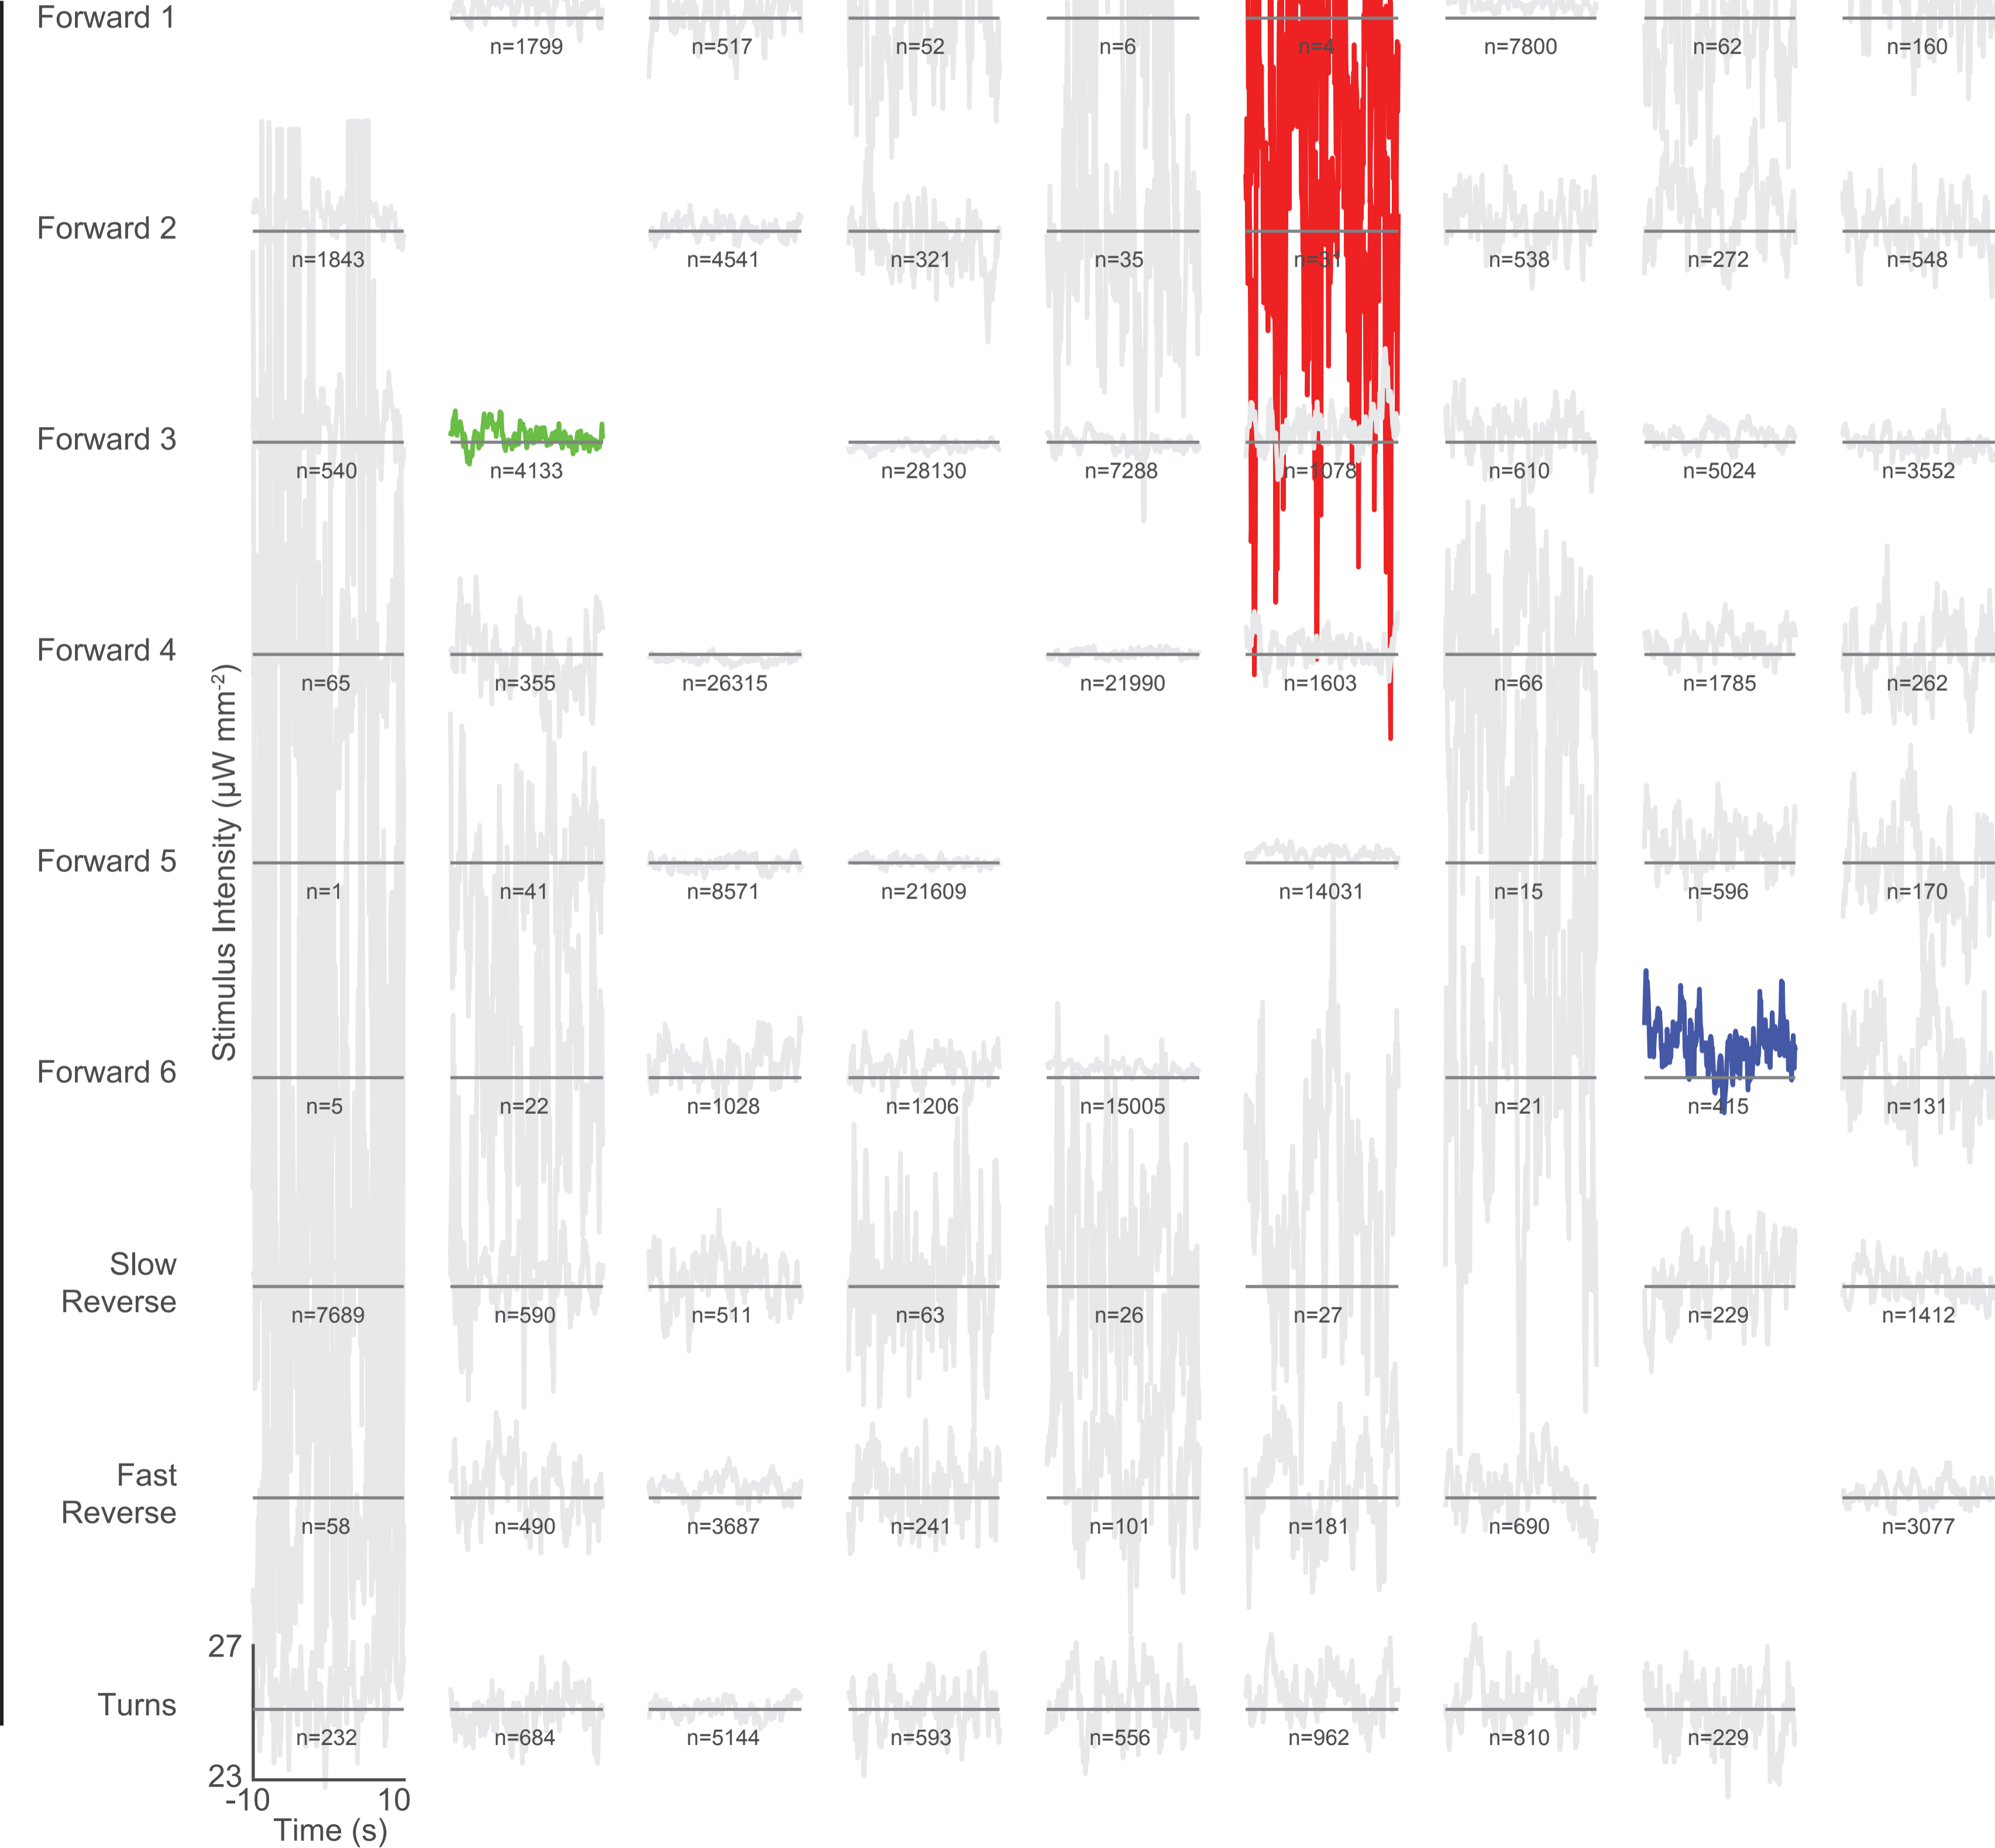

Supplement: supp [file elife-36419-supp-v1.zip › elife_poa_e36419_Figure_6_figure_supplement_2.pdf]
