# Supplementary material for: Temporal processing and context dependency in Caenorhabditis elegans response to mechanosensation
Source: eLife journal article supplement (doi:10.7554/elife.36419), 2018-06-25
Supplement: supp [file elife-36419-supp-v1.zip › elife_poa_e36419_Figure_8_source_data_1.xlsx]

## Sheet: Sheet1
		Transition Into
		Forward 1	Forward 2	Forward 3	Forward 4	Forward 5	Forward 6	Slow Revers	Fast Reverse	Turn
Transition From	Forward 1		0.864665	1	1	1	1	0.0316827	1	1
	Forward 2	0.185381		0.329832	1	1	1	0.476708	0.864665	1
	Forward 3	0.482153	0.372592		0.00216548	0.00323567	0.0413126	0.00965991	0	0.490632
	Forward 4	1	0.864665	1.42481e-06		1.96787e-06	0.864665	0.0884386	0	1
	Forward 5	1	1	0.355531	0.00488813		4.23191e-07	1	1.96016e-09	1
	Forward 6	1	1	0.018503	0.059395	9.53046e-09		1	0	1
	Slow Reverse	0.75162	0.864665	0.482153	0.864665	1	1		0.482153	0.737252
	Fast Reverse	1	0.482153	0.0717347	0.482153	0.482153	1.3695e-06	0.908433		0.164535
	Turn	1	1	0.674861	1	1	0.482153	0.727371	0.680796
