# Supplementary material for: Temporal processing and context dependency in Caenorhabditis elegans response to mechanosensation
Source: eLife journal article supplement (doi:10.7554/elife.36419), 2018-06-25
Supplement: supp [file elife-36419-supp-v1.zip › elife_poa_e36419_Figure_8_source_data_2.xlsx]

## Sheet: Sheet1
		Transition Into
		Forward 1	Forward 2	Forward 3	Forward 4	Forward 5	Forward 6	Slow Revers	Fast Reverse	Turn
Transition From	Forward 1		0.000797735	0.259953	0.48216	1	1	1.99244e-05	1	0.0418199
	Forward 2	0.0996903		0.2939	0.147473	1	0.48216	0.0347957	0.00084349	0.0827098
	Forward 3	0.00419507	0		0.458318	0.654422	0.096147	9.58709e-09	0	0.00594561
	Forward 4	0.124744	0.0392281	0		0	3.837e-05	0.00010246	0	0.202739
	Forward 5	0.48216	0.0577547	0.0336129	0		0	1	0	0.474881
	Forward 6	0.48216	0.0418199	0	0.00316572	0		0.124744	0	0.202739
	Slow Reverse	4.60838e-12	0.00382766	2.59856e-06	0.48216	1	0.48216		0.0161658	0.414176
	Fast Reverse	0.48216	0.408633	1.37397e-05	0.0232441	0.0298196	6.1657e-14	0.938242		0.470418
	Turn	0.420363	0.228316	0.0831276	0.112721	0.0633191	0.245939	0.0357063	0.339754
