# Supplementary material for: Temporal processing and context dependency in Caenorhabditis elegans response to mechanosensation
Source: eLife journal article supplement (doi:10.7554/elife.36419), 2018-06-25
Supplement: supp [file elife_poa_e36419_Figure_2_figure_supplement_1.pdf › elife_poa_e36419_Figure_2_figure_supplement_1.pdf]

## Optogenetic Stimuli

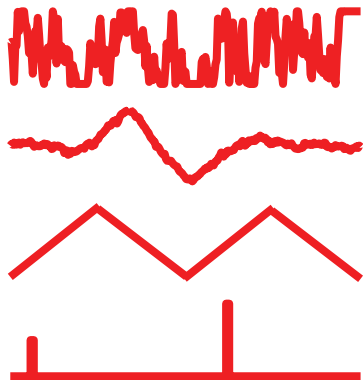

## 625 nm LED

## Solenoid



Diagram illustrating Tap Stimuli. It shows a horizontal line with two vertical lines extending upwards from it, representing the points of contact for the taps.

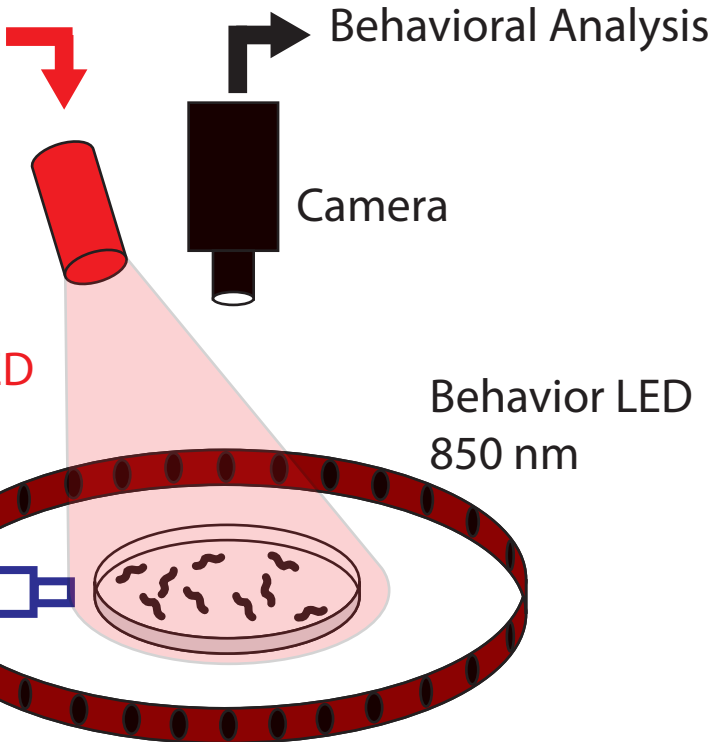

Behavior LED  
850 nm
