# Supplementary figures and images for: Temporal processing and context dependency in Caenorhabditis elegans response to mechanosensation
Source: eLife journal article supplement (doi:10.7554/elife.36419), 2018-06-25

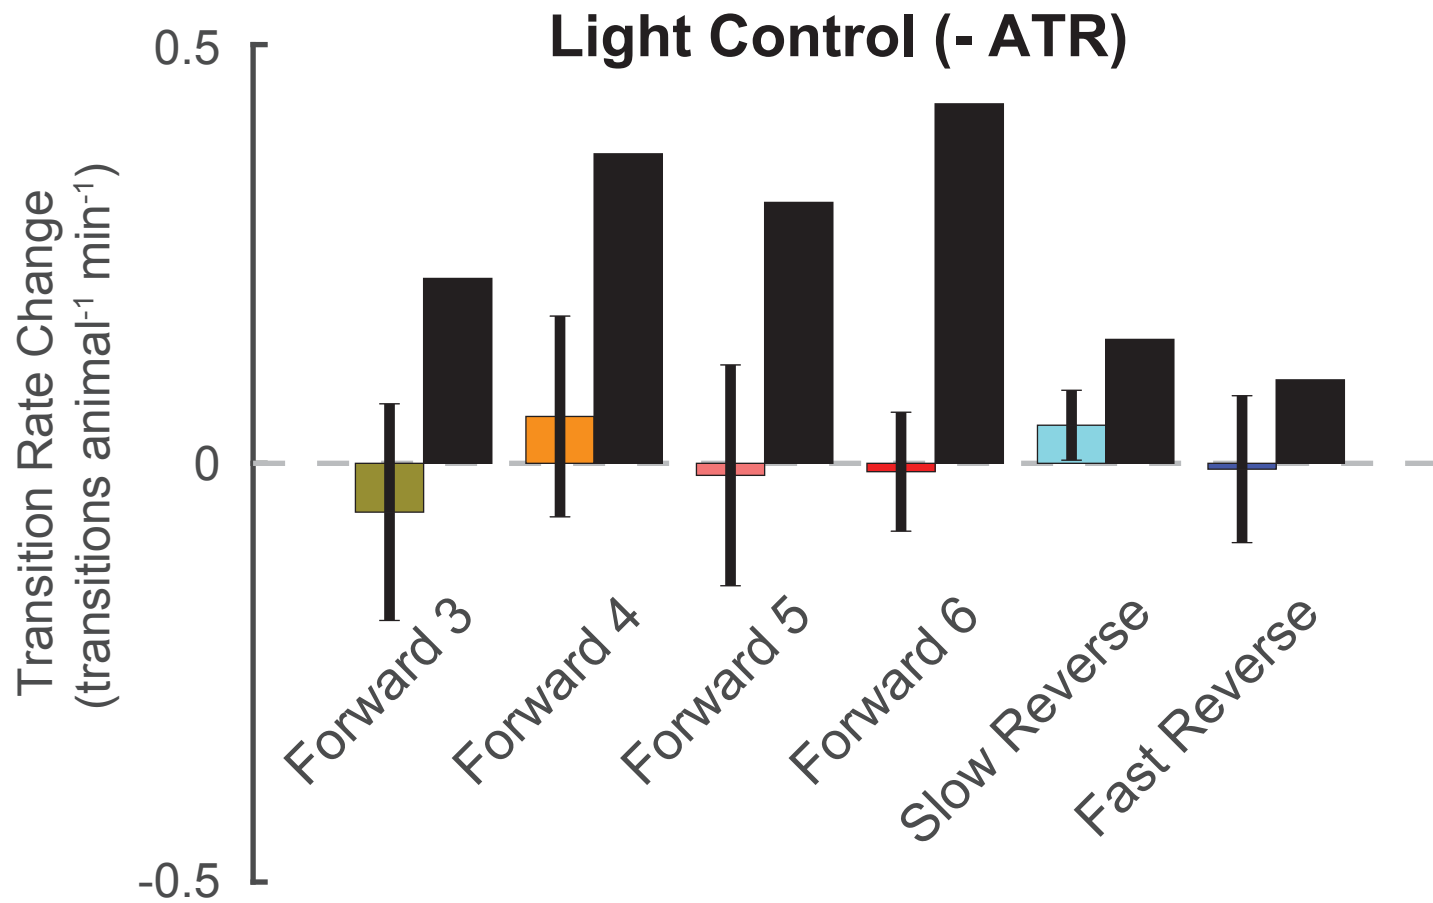

Supplement: supp [file elife-36419-supp-v1.zip › elife_poa_e36419_Figure_4_figure_supplement_2.pdf]

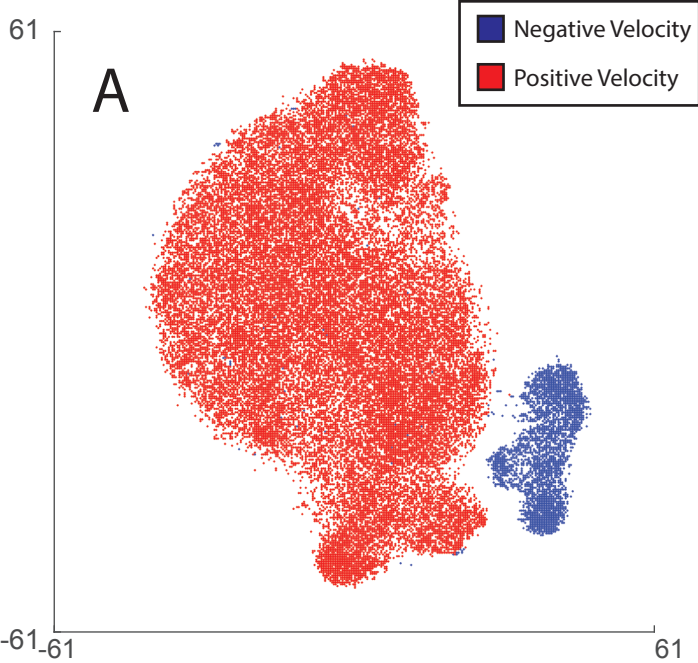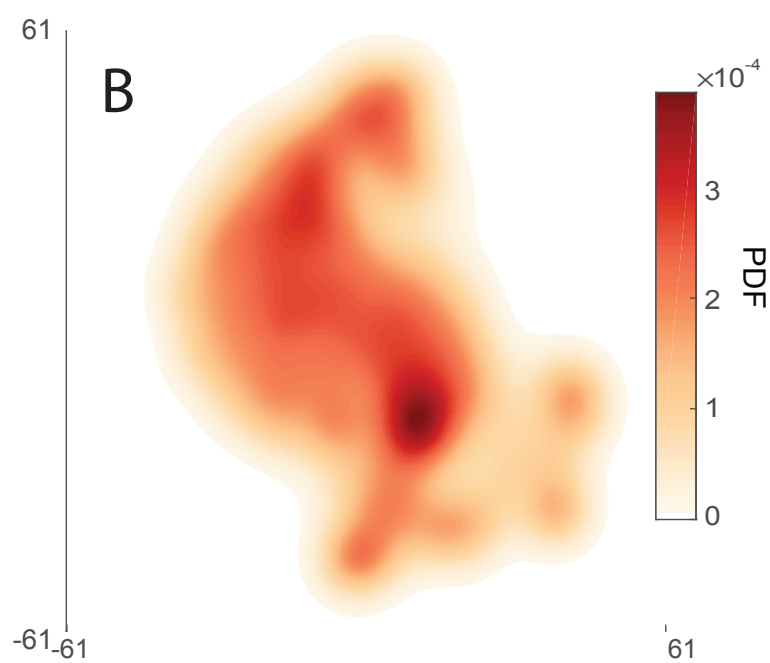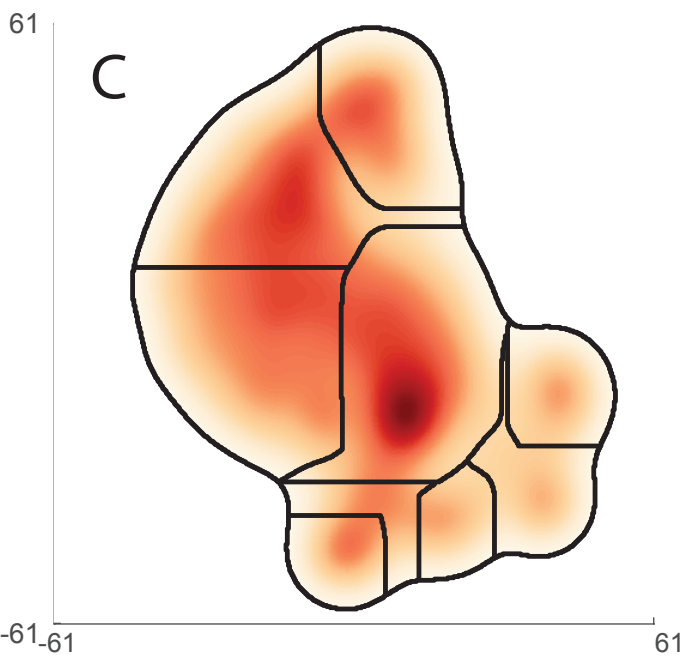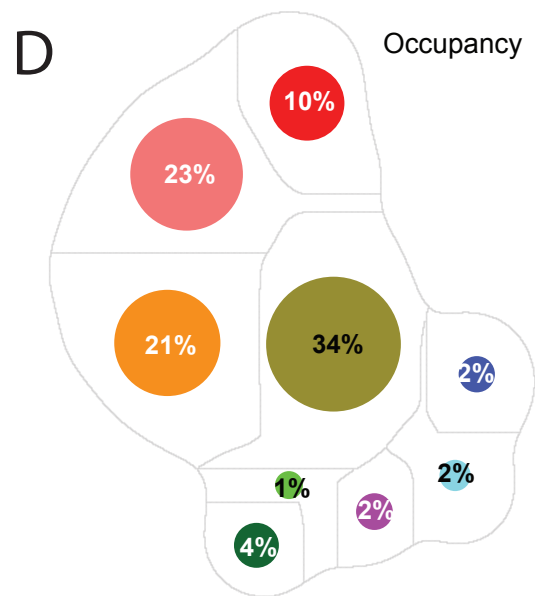

Supplement: supp [file elife-36419-supp-v1.zip › elife_poa_e36419_Figure_1_figure_supplement_2.pdf]

## Optogenetic Stimuli

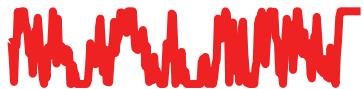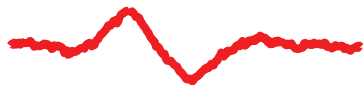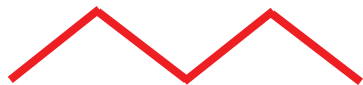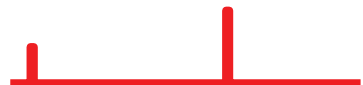

625 nm LED

Solenoid

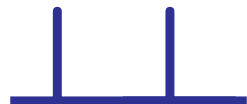

Tap Stimuli

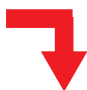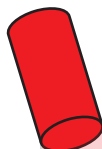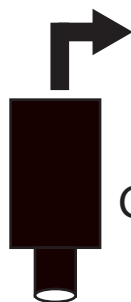

Behavioral Analysis

Camera

Behavior LED  
850 nm

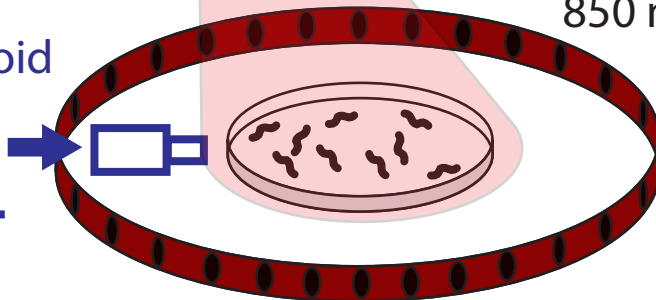

Supplement: supp [file elife-36419-supp-v1.zip › elife_poa_e36419_Figure_2_figure_supplement_1.pdf]

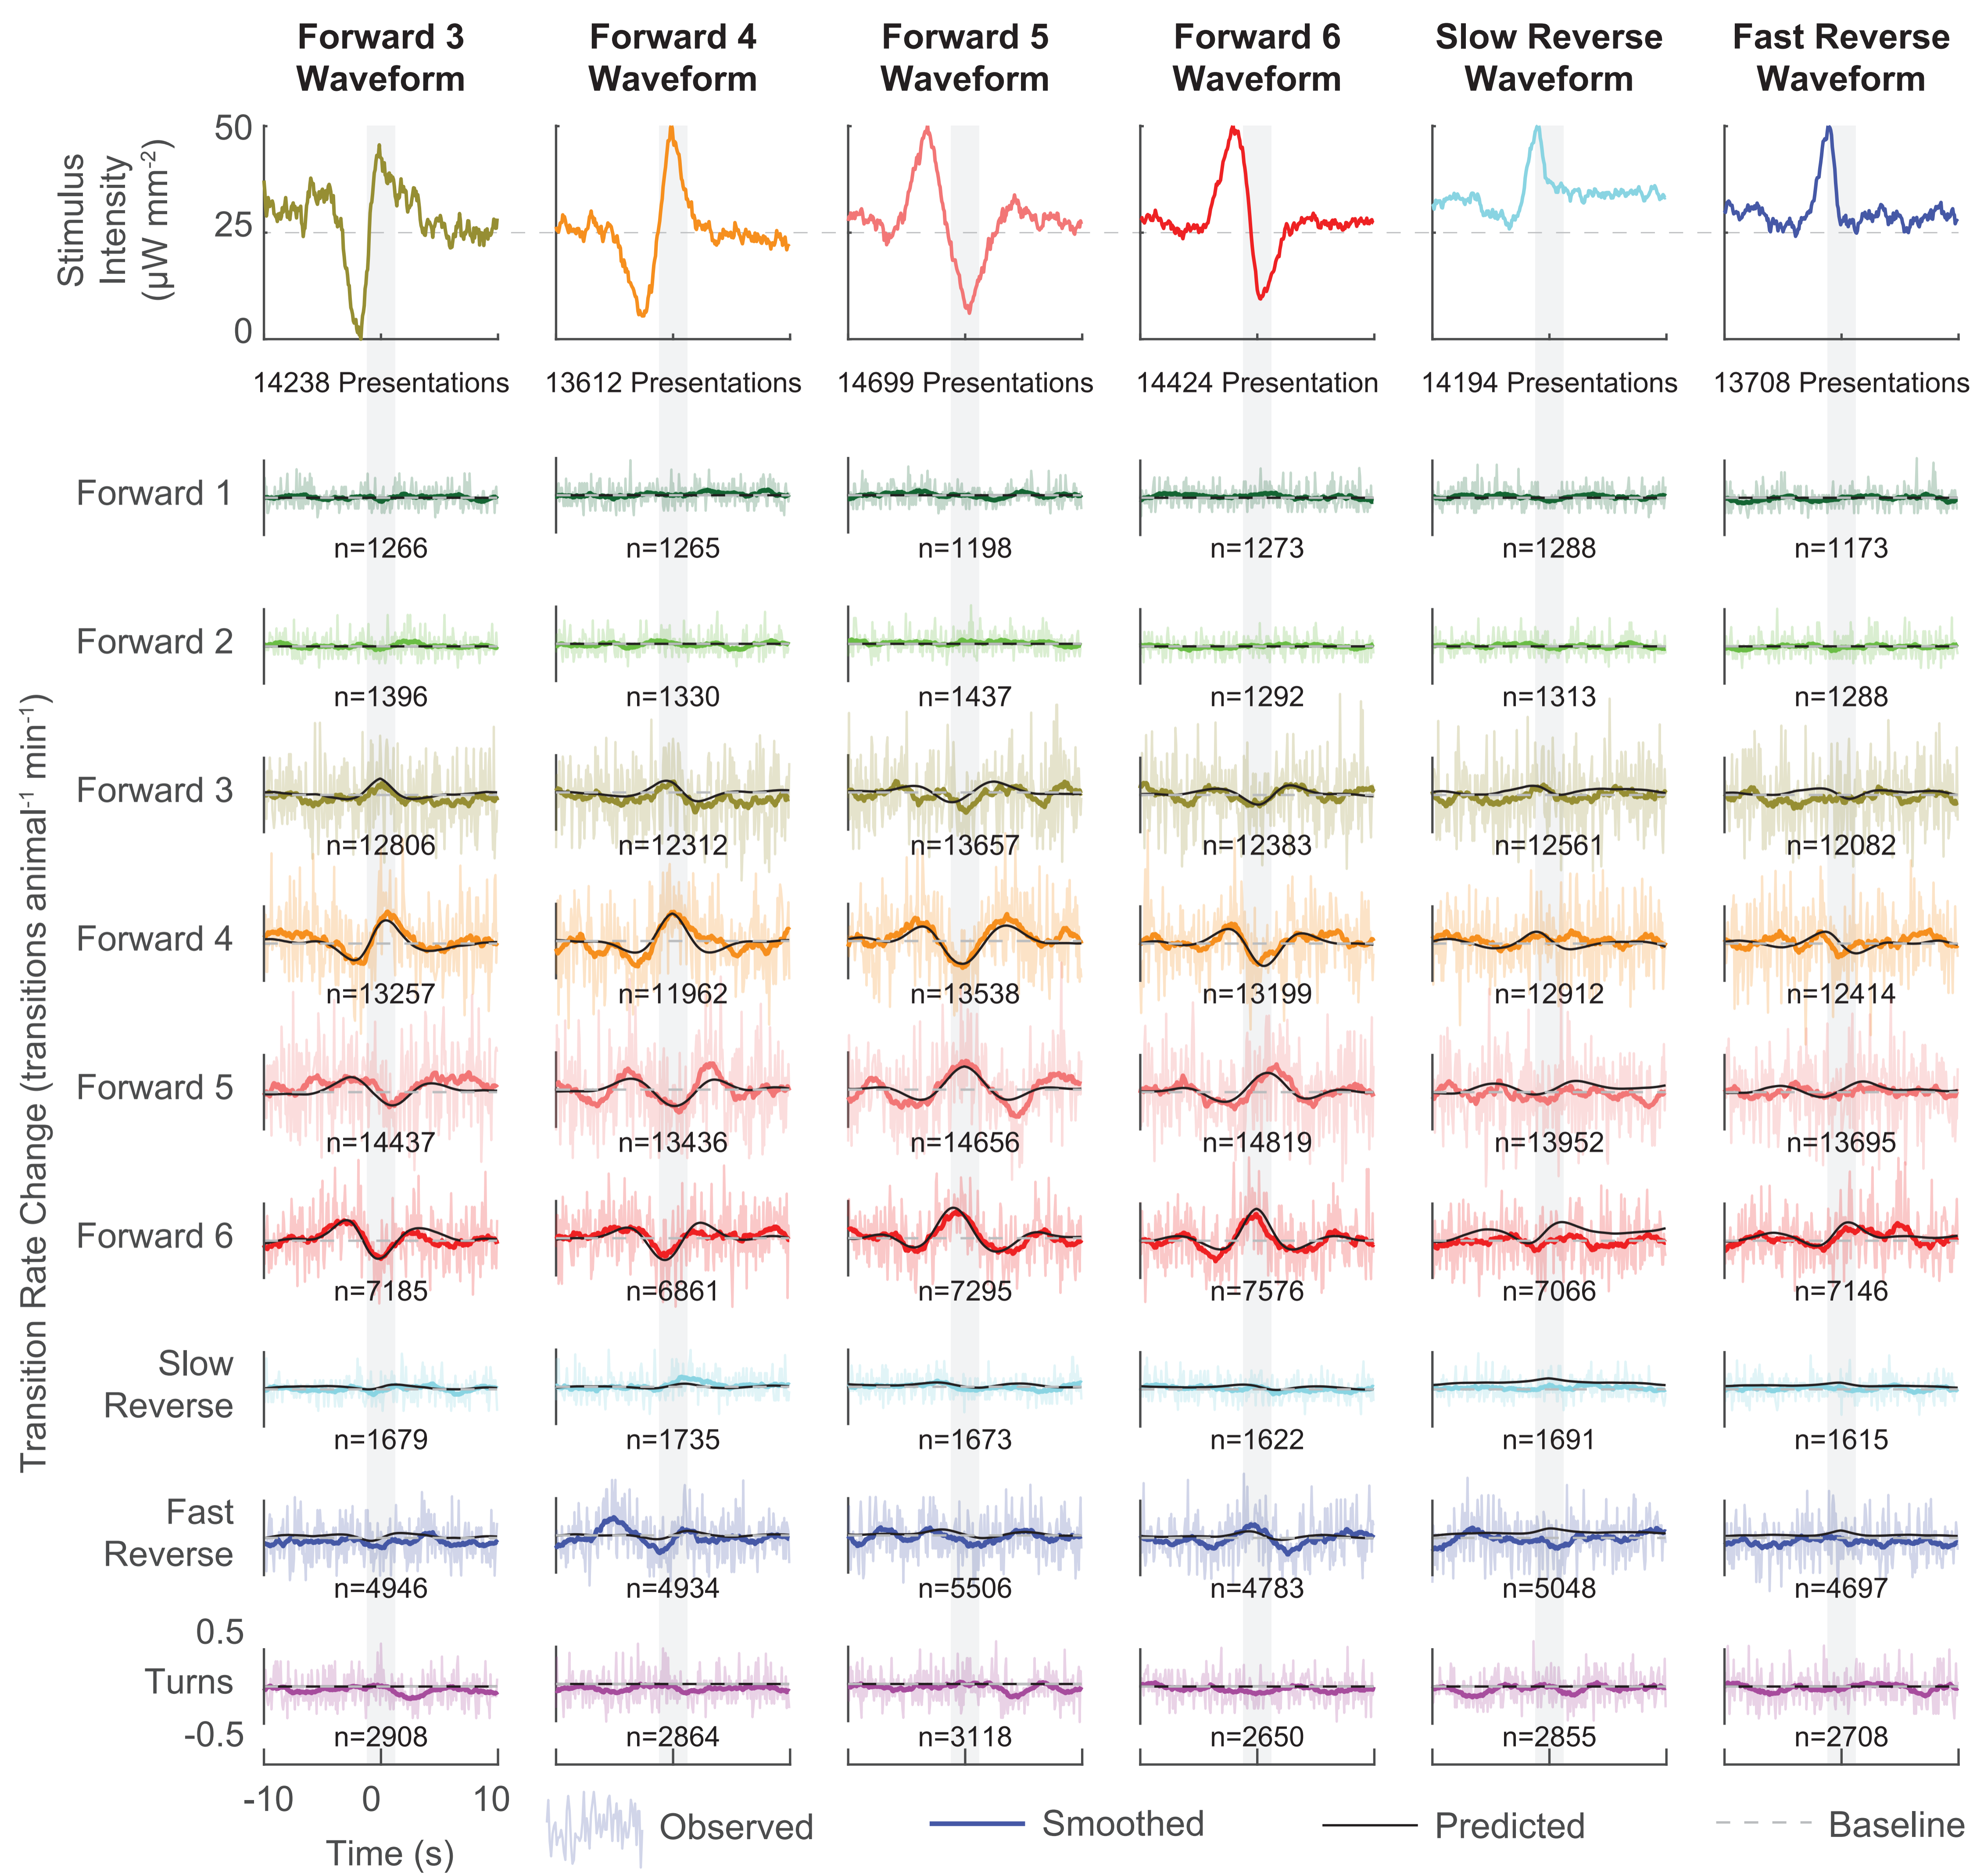

Supplement: supp [file elife-36419-supp-v1.zip › elife_poa_e36419_Figure_4_figure_supplement_1.pdf]

**Random Noise Stimulus Power Spectra**

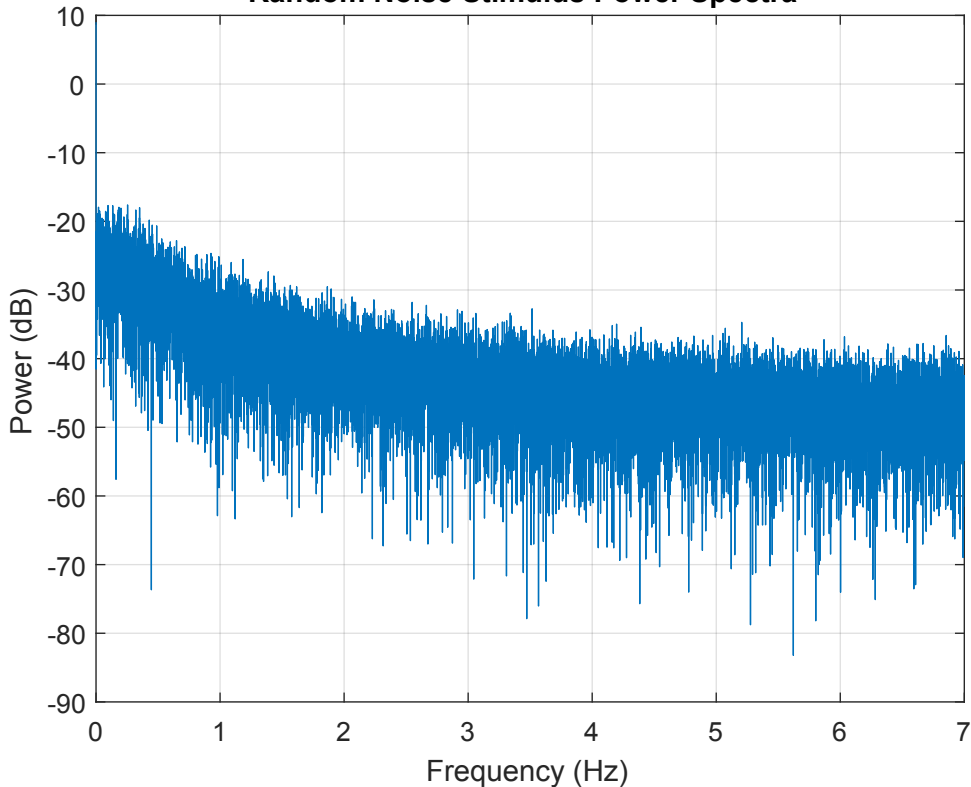

Supplement: supp [file elife-36419-supp-v1.zip › elife_poa_e36419_Figure_3_figure_supplement_4.pdf]

# Light Control (- ATR)

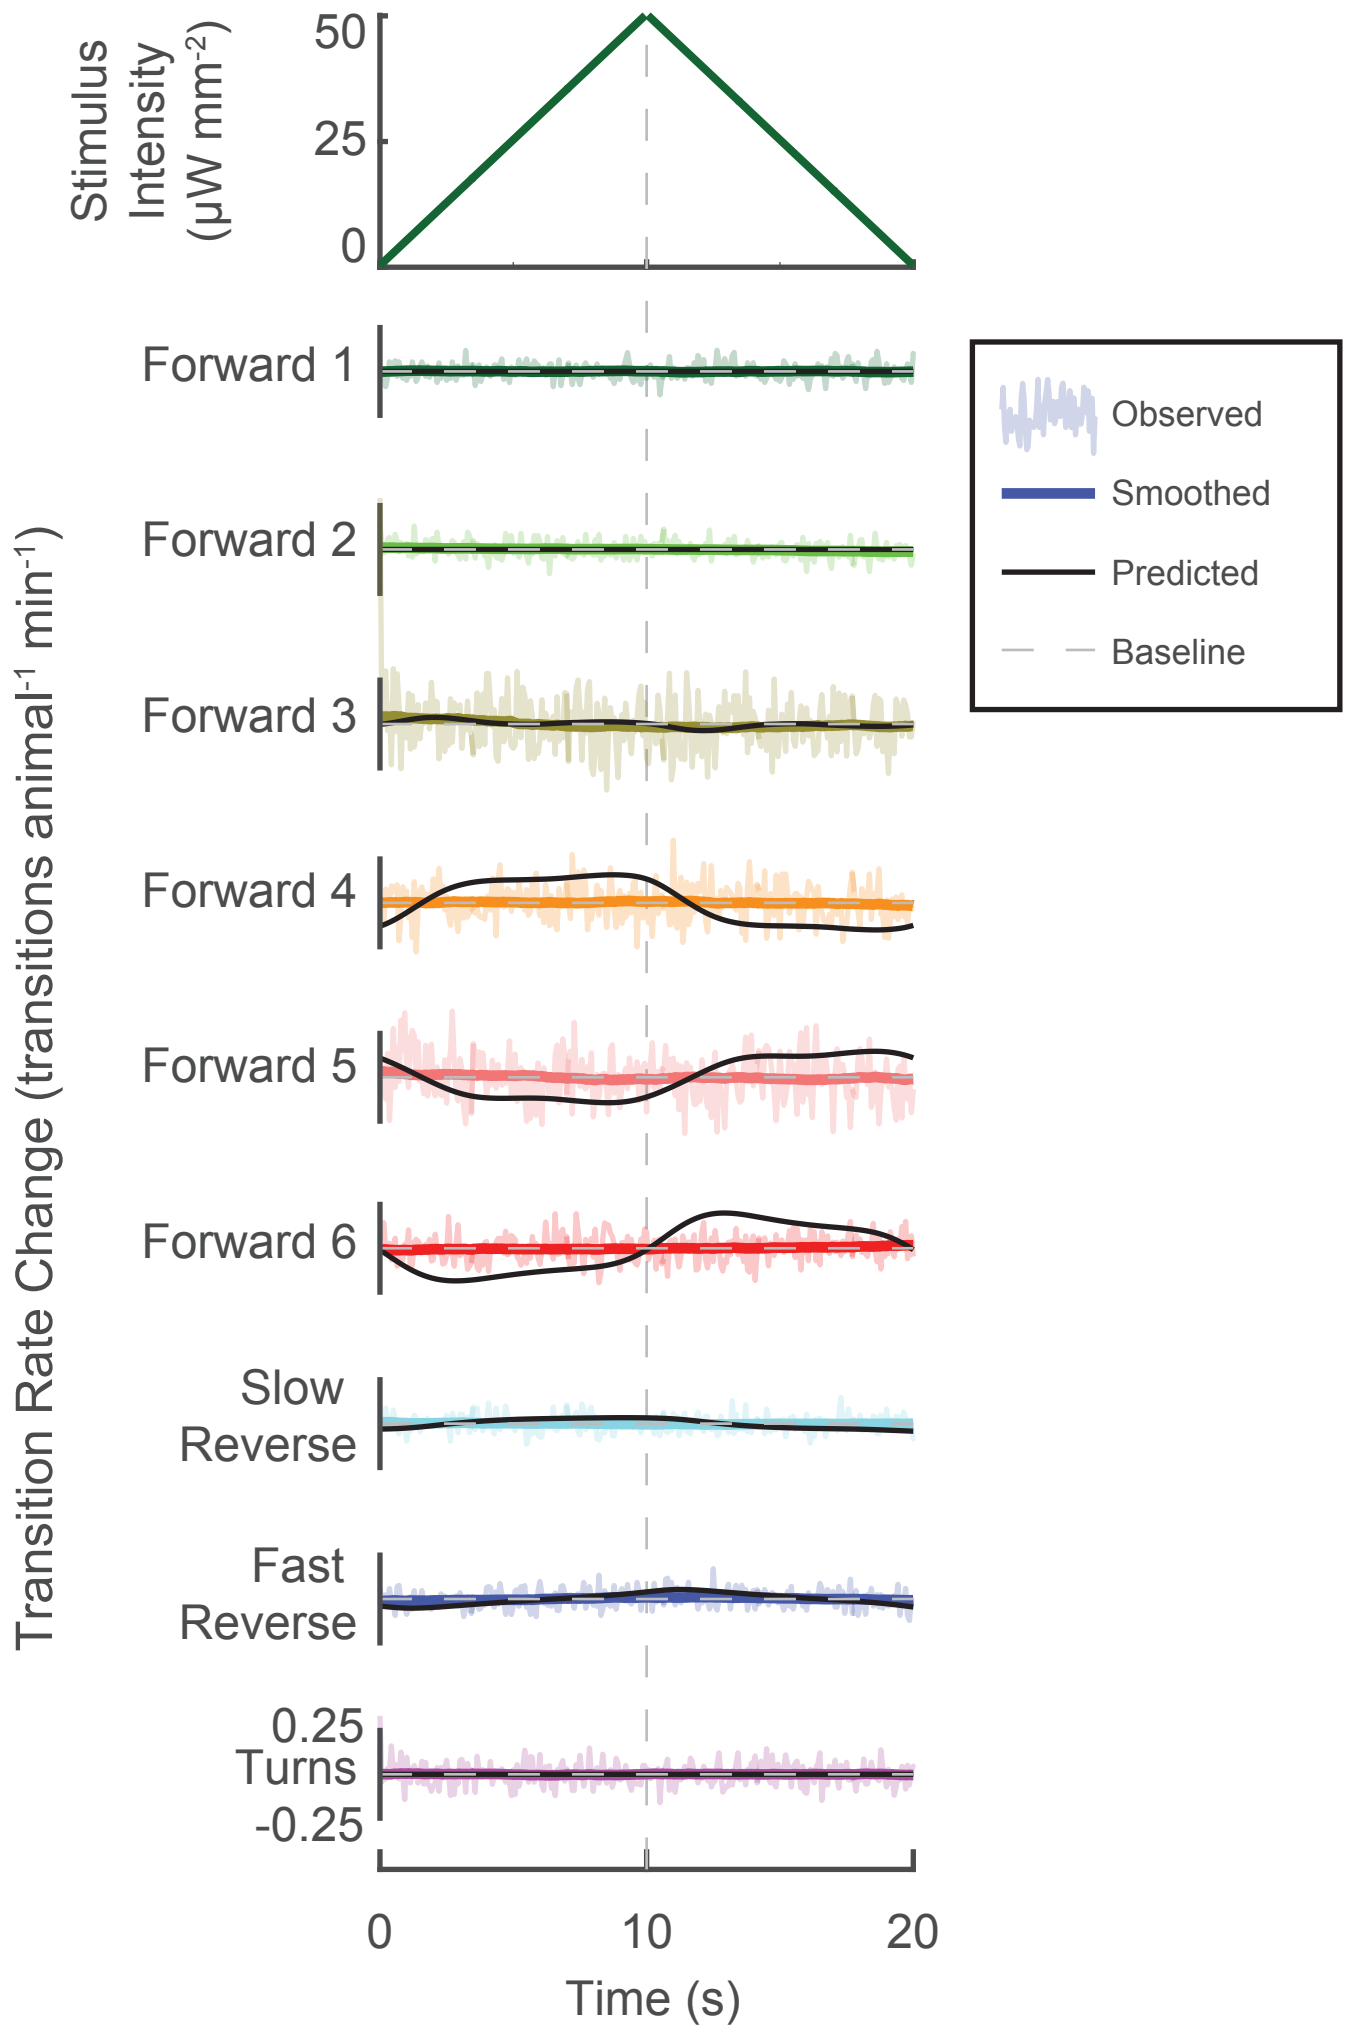

Supplement: supp [file elife-36419-supp-v1.zip › elife_poa_e36419_Figure_5_figure_supplement_1.pdf]

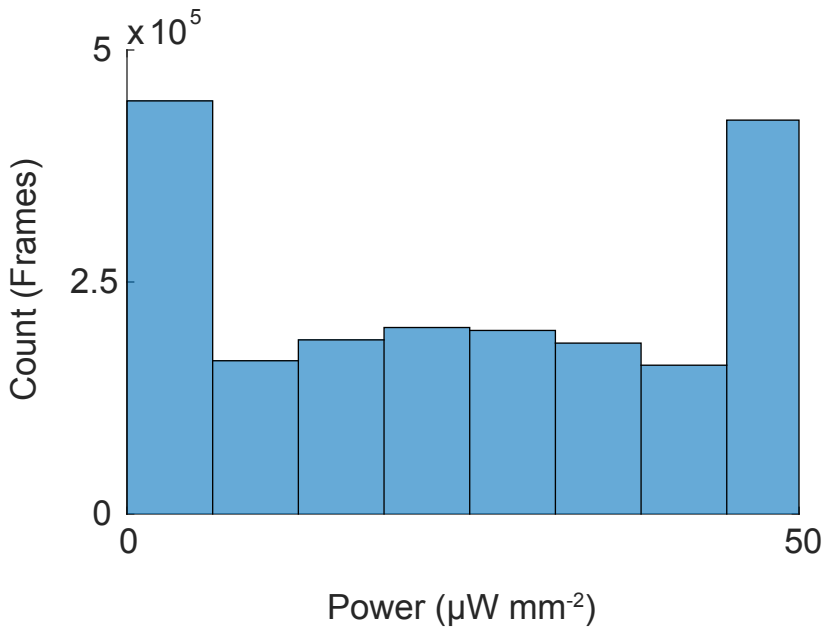

Supplement: supp [file elife-36419-supp-v1.zip › elife_poa_e36419_Figure_3_figure_supplement_5.pdf]

# AML67 Tap

(35,514 stimulus-animal presentations)

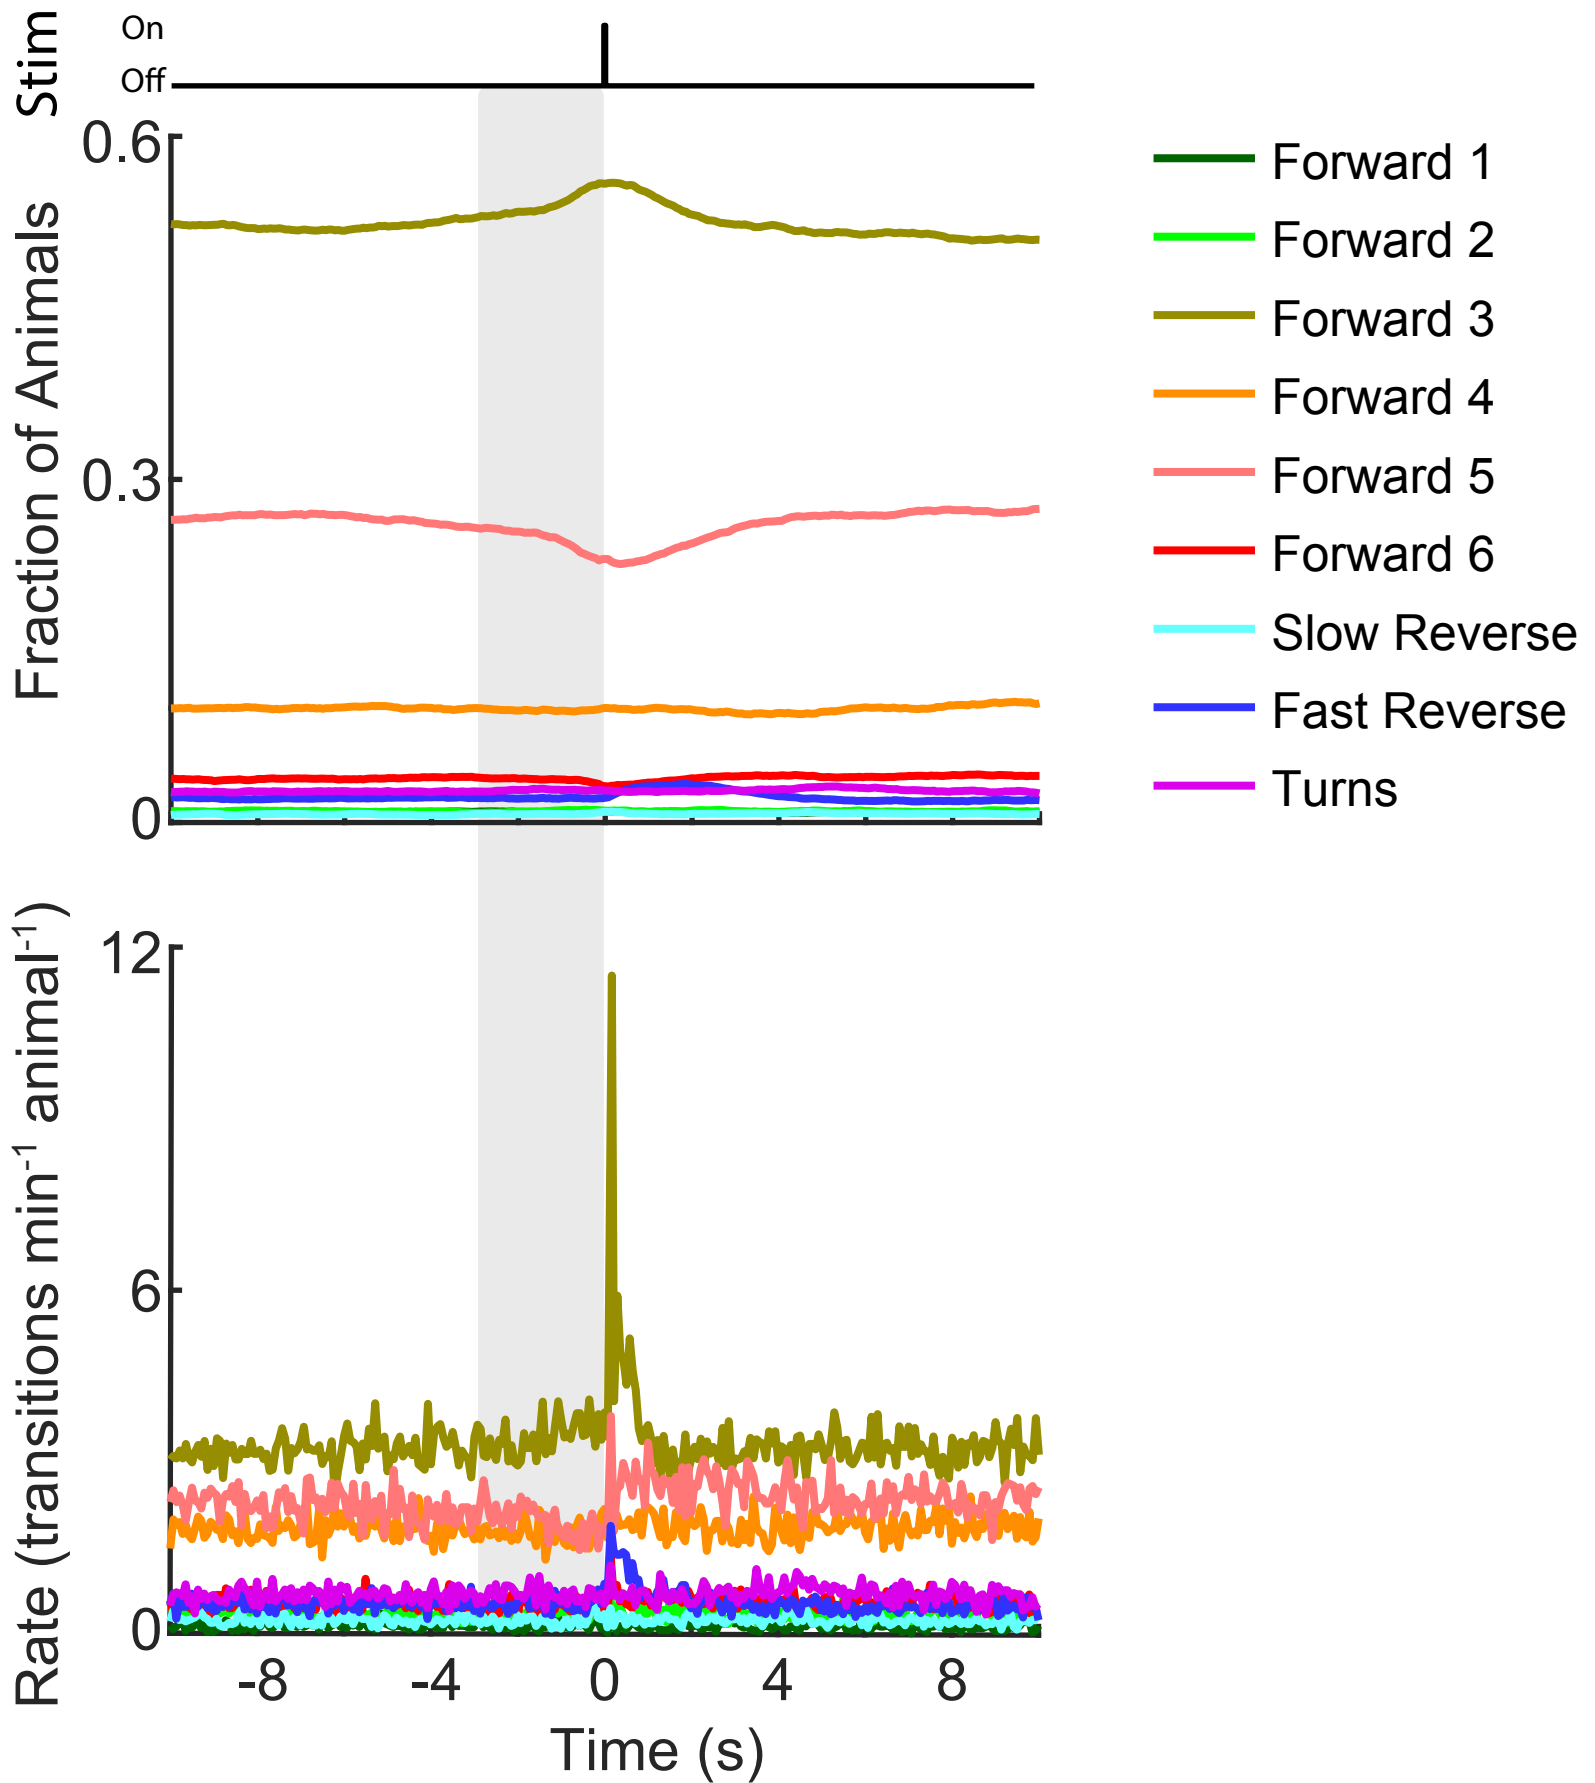

Supplement: supp [file elife-36419-supp-v1.zip › elife_poa_e36419_Figure_2_figure_supplement_4.pdf]

## Raw Images

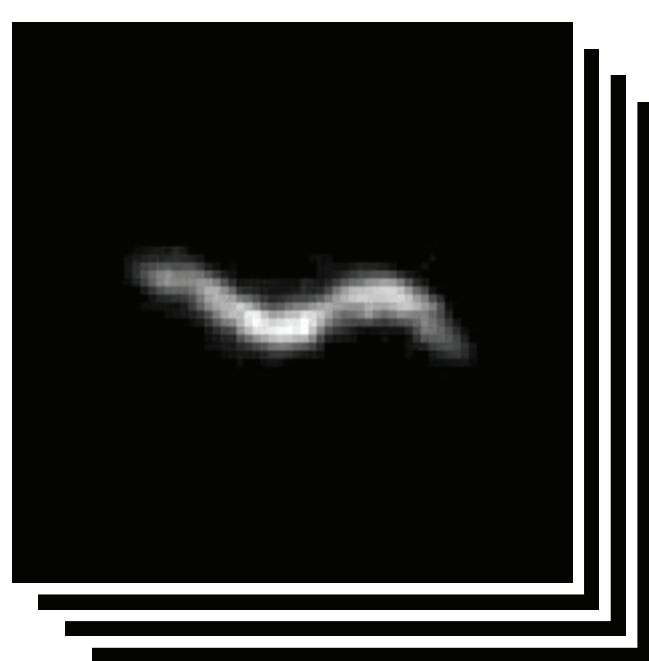

## Centerlines

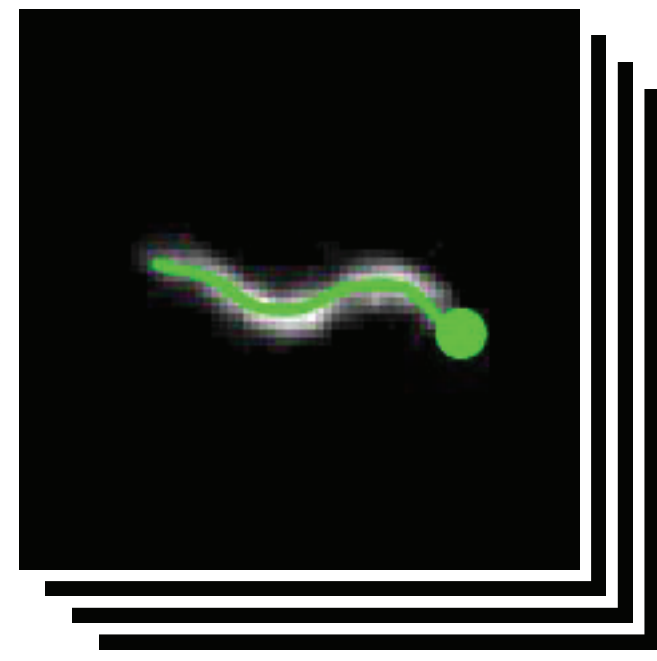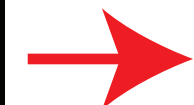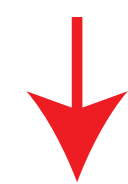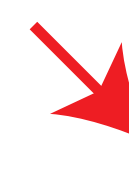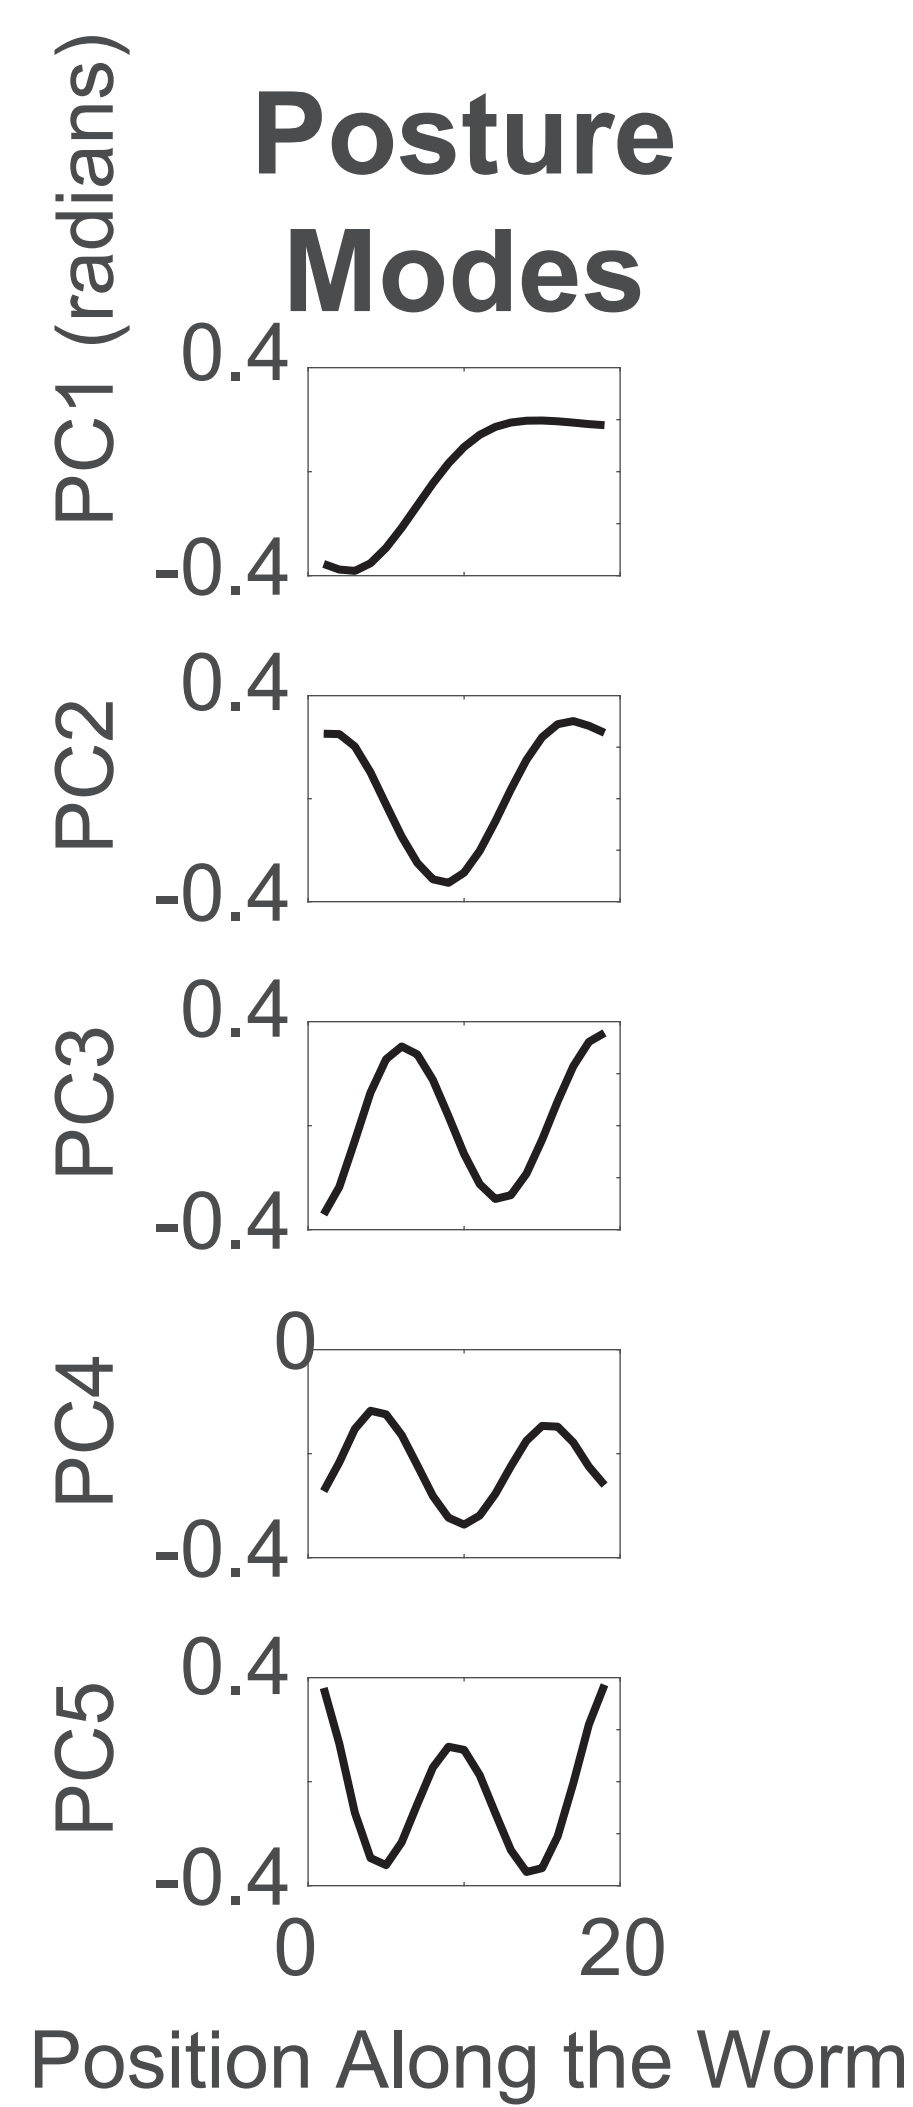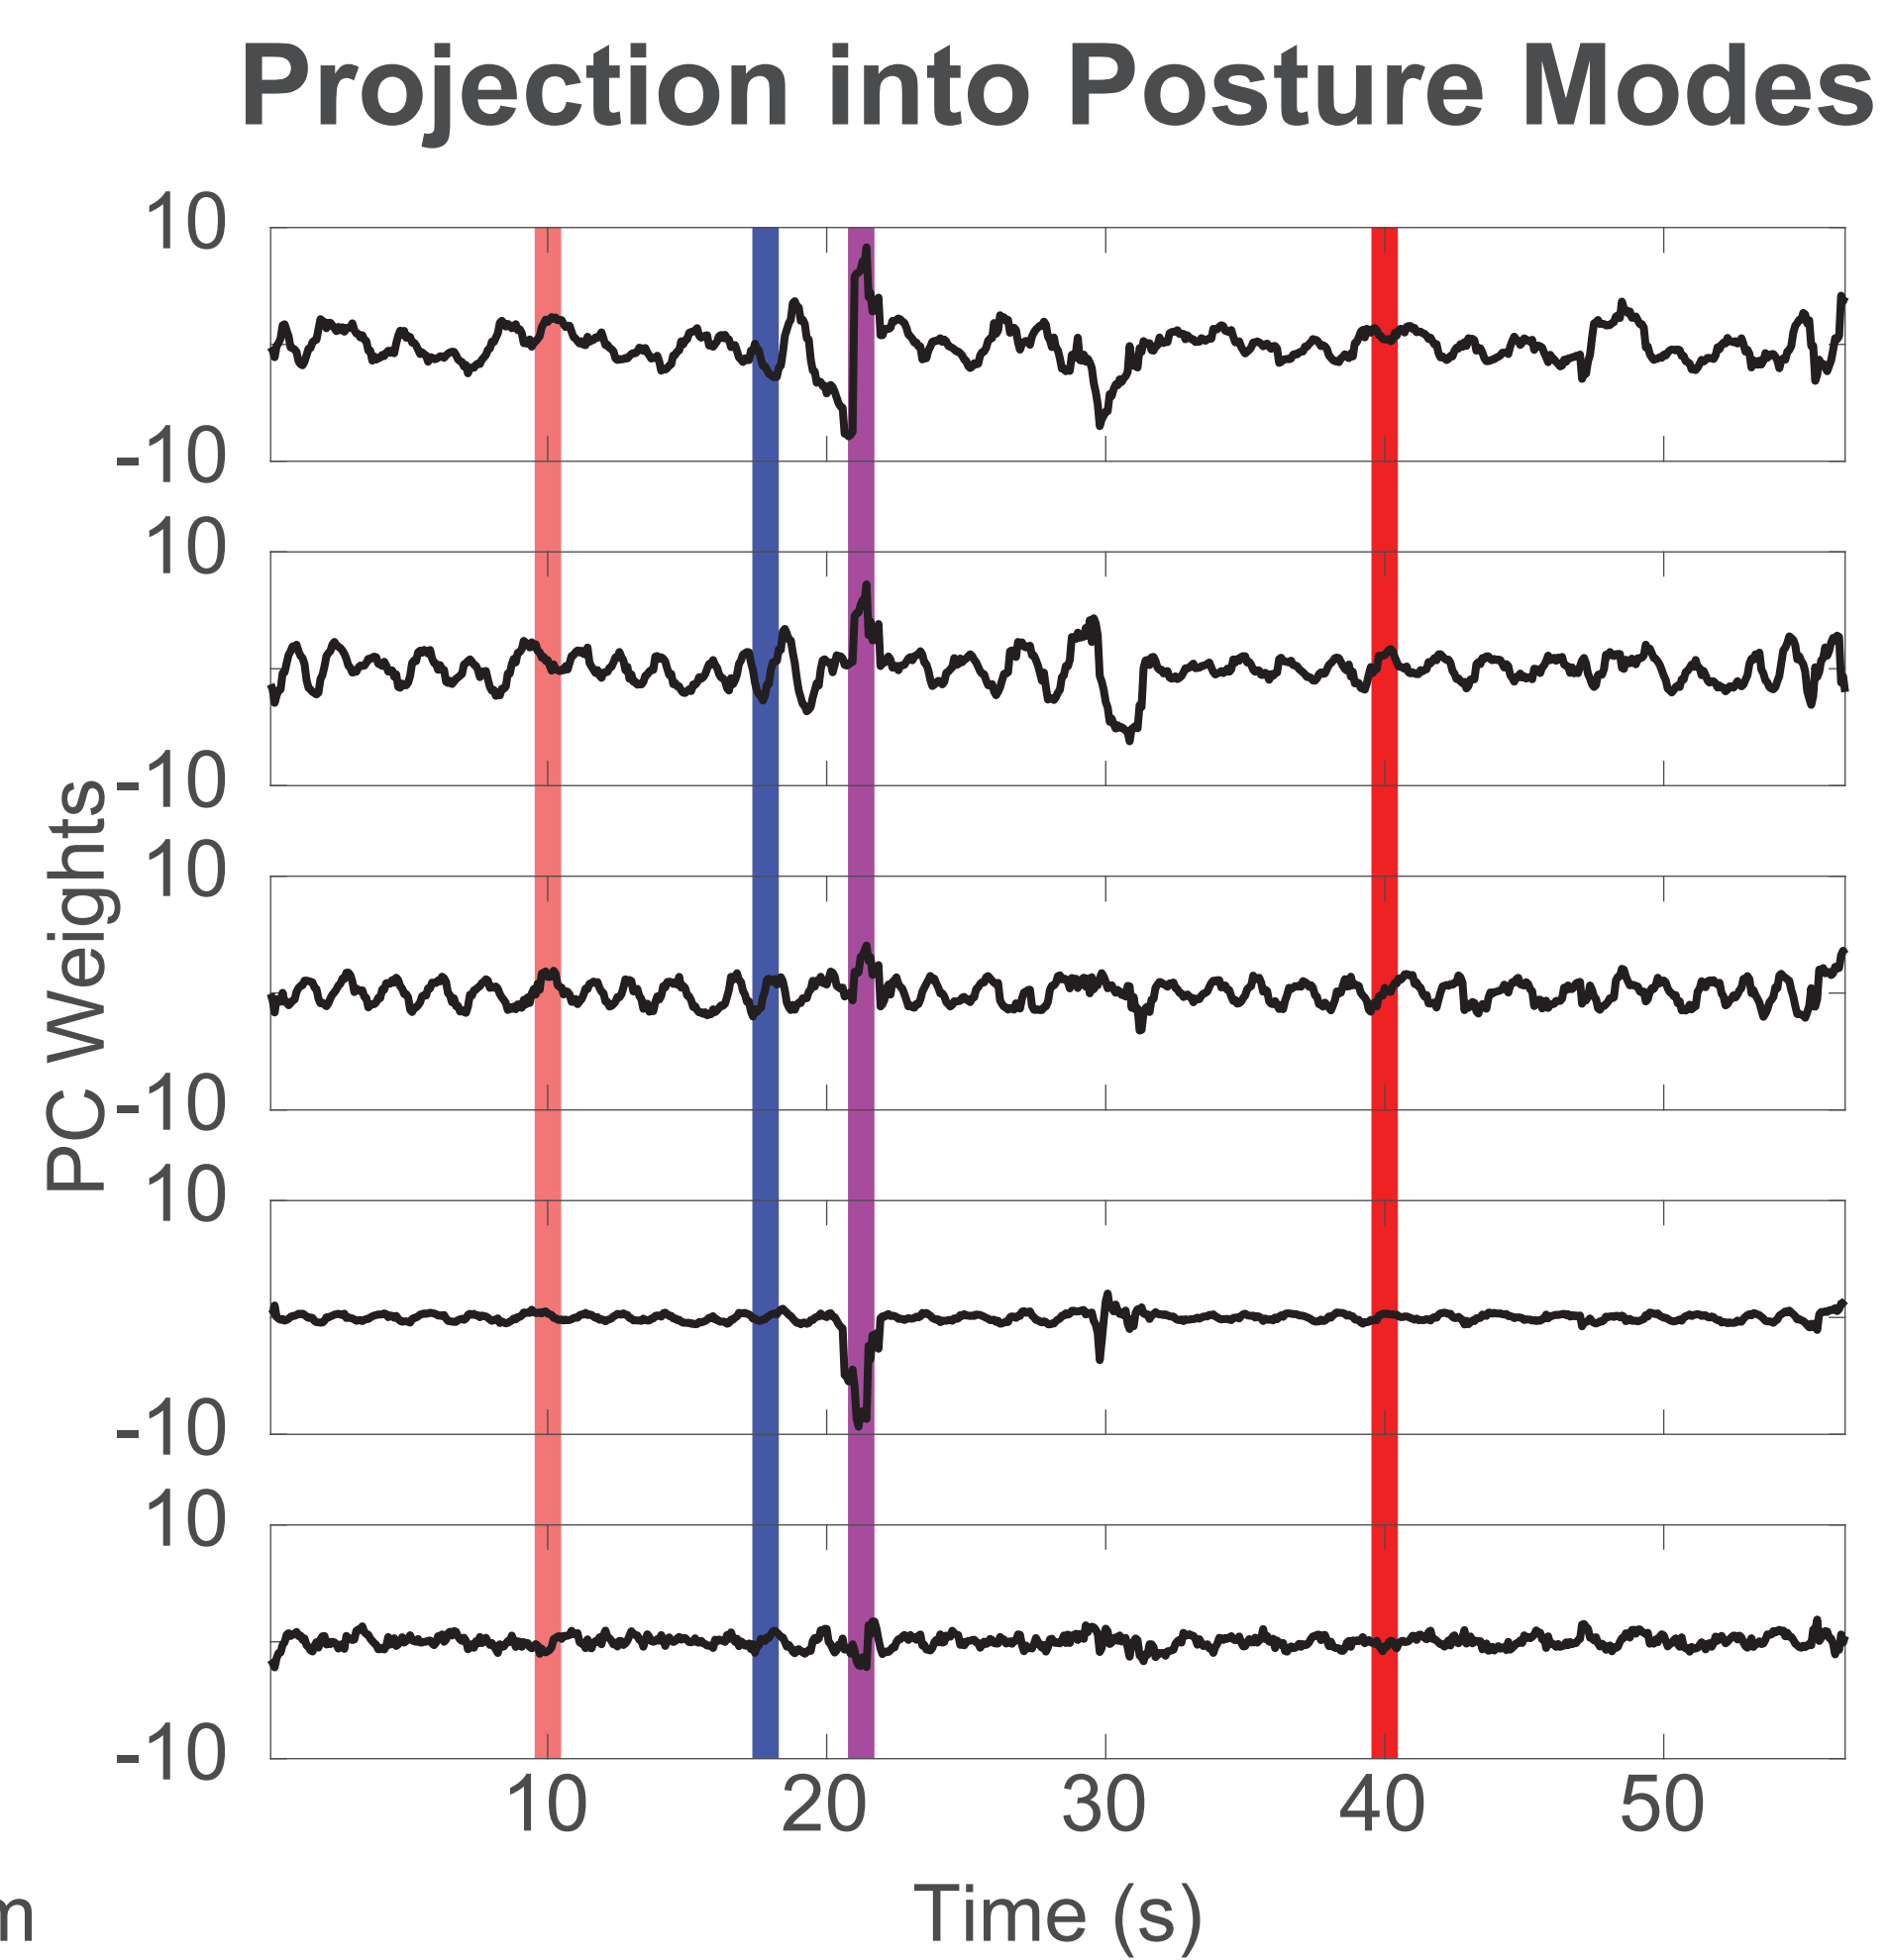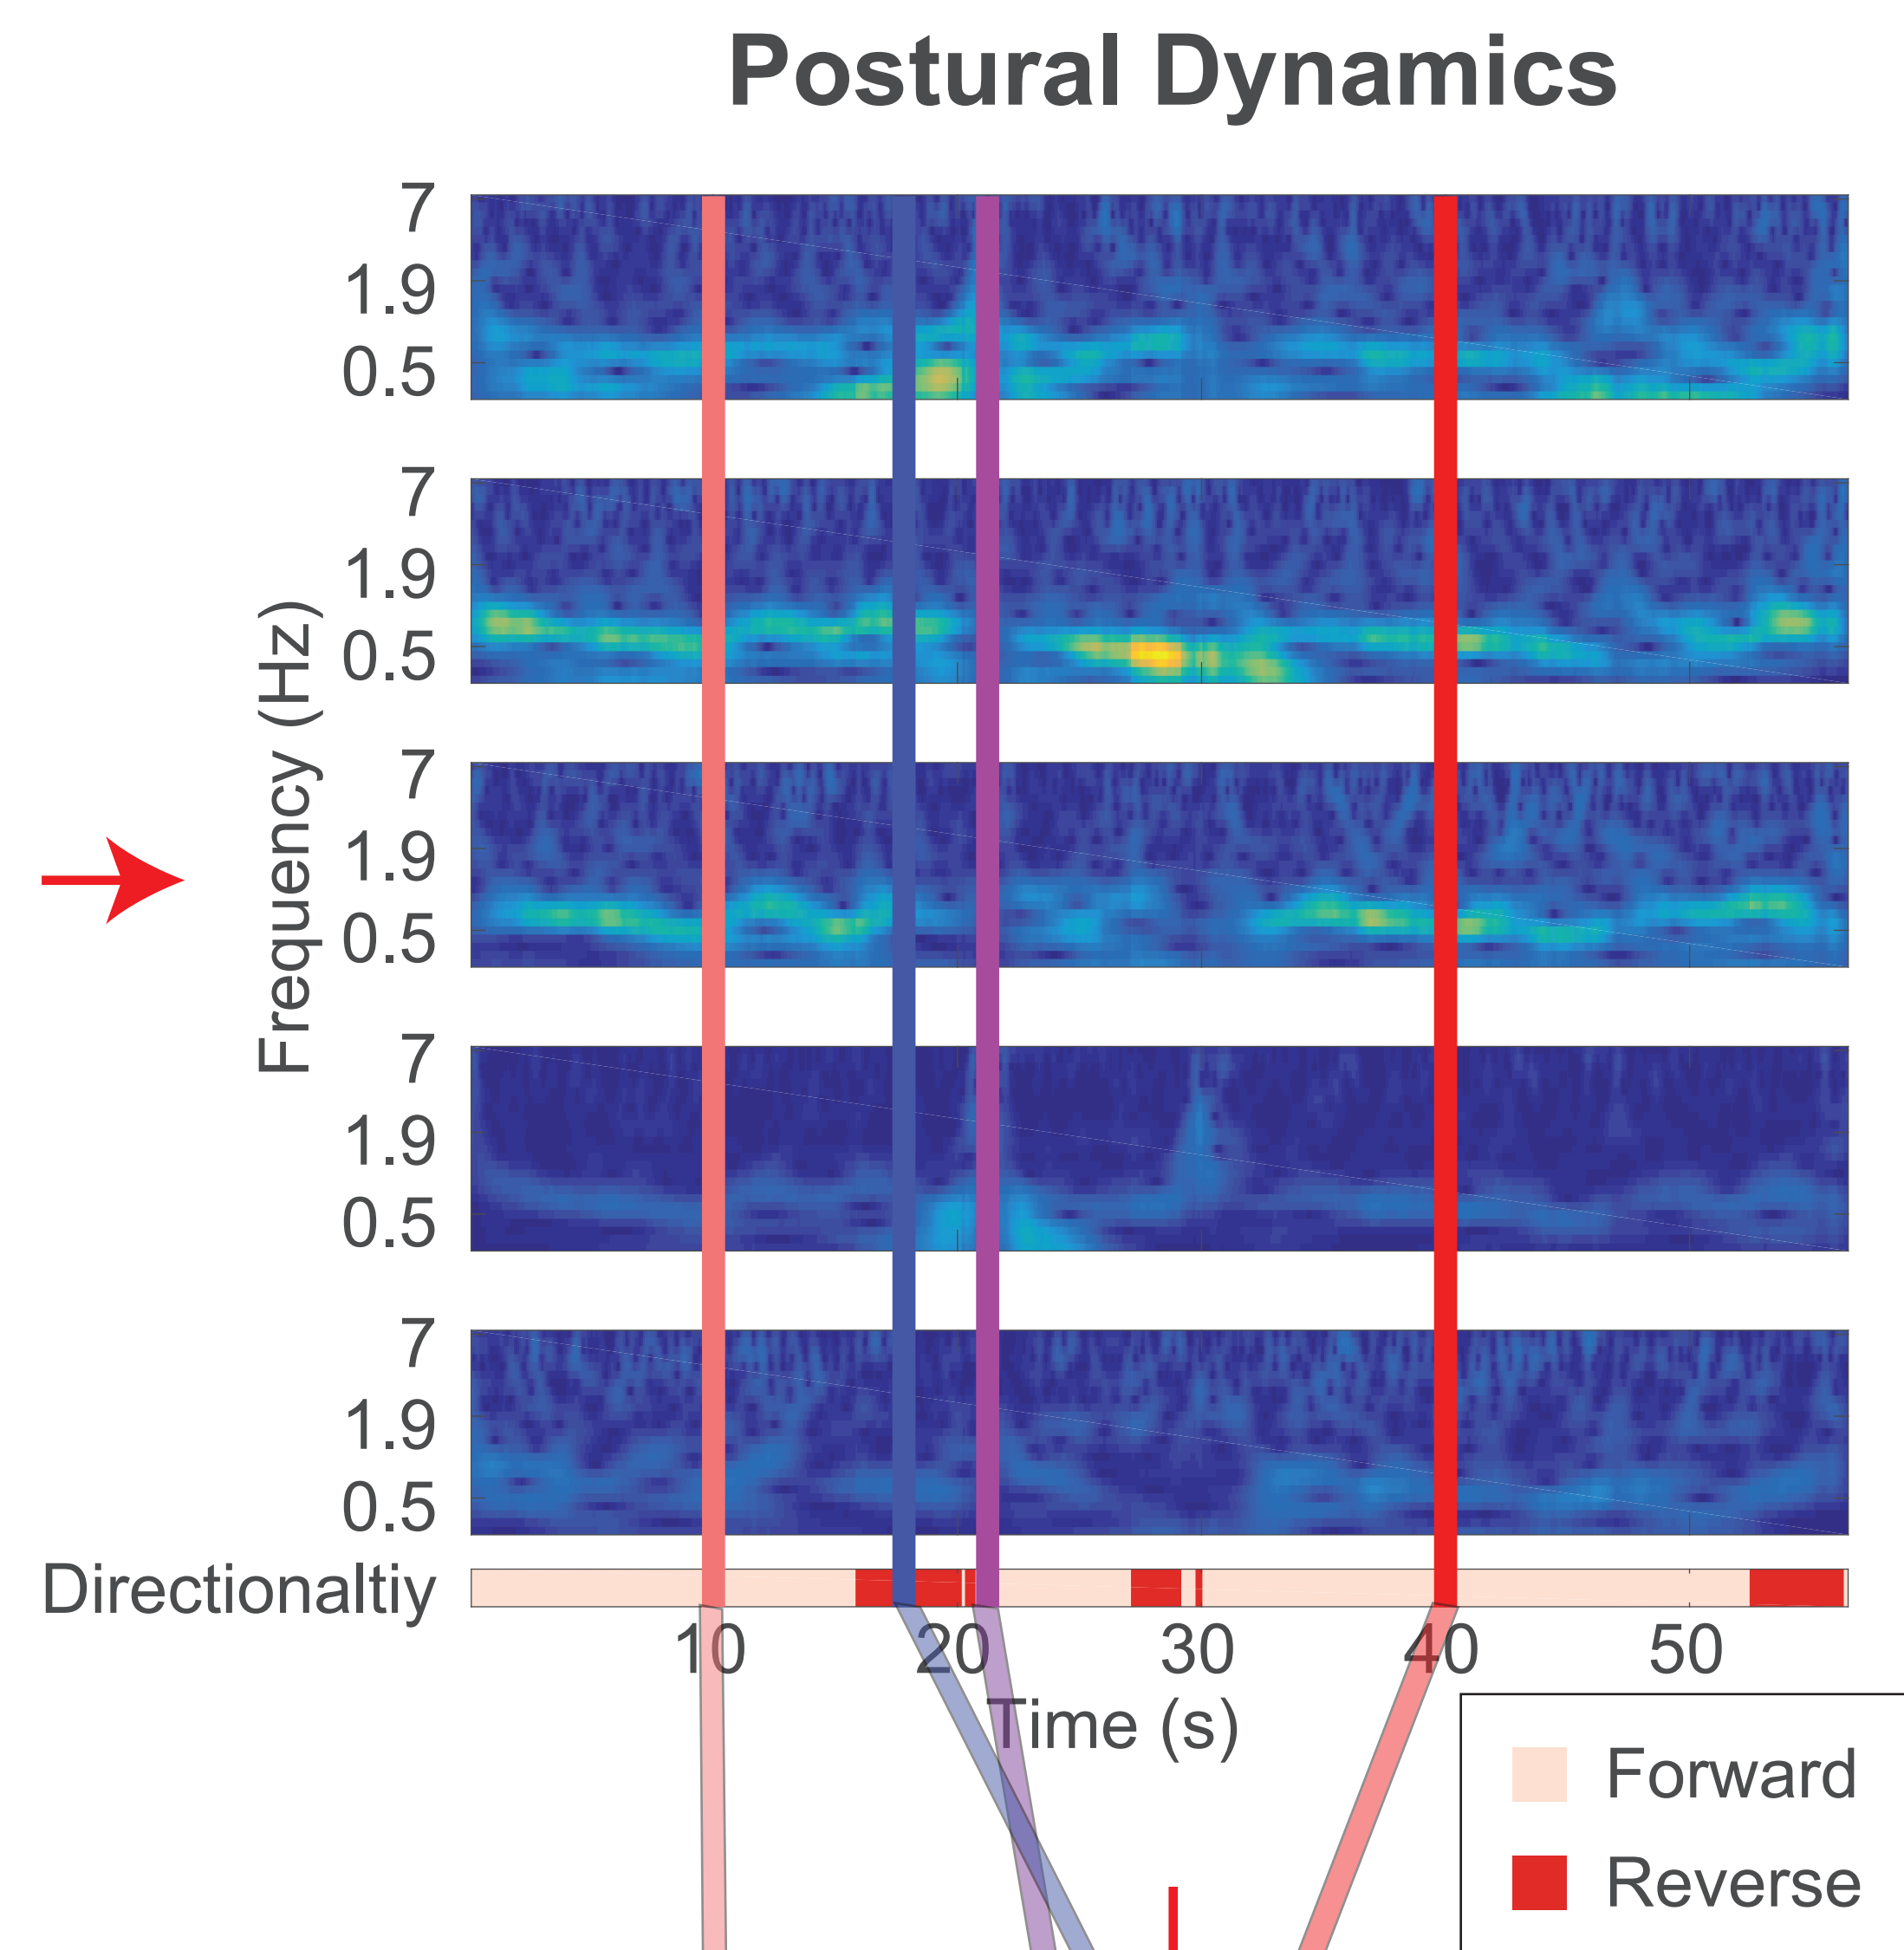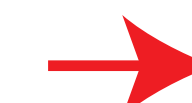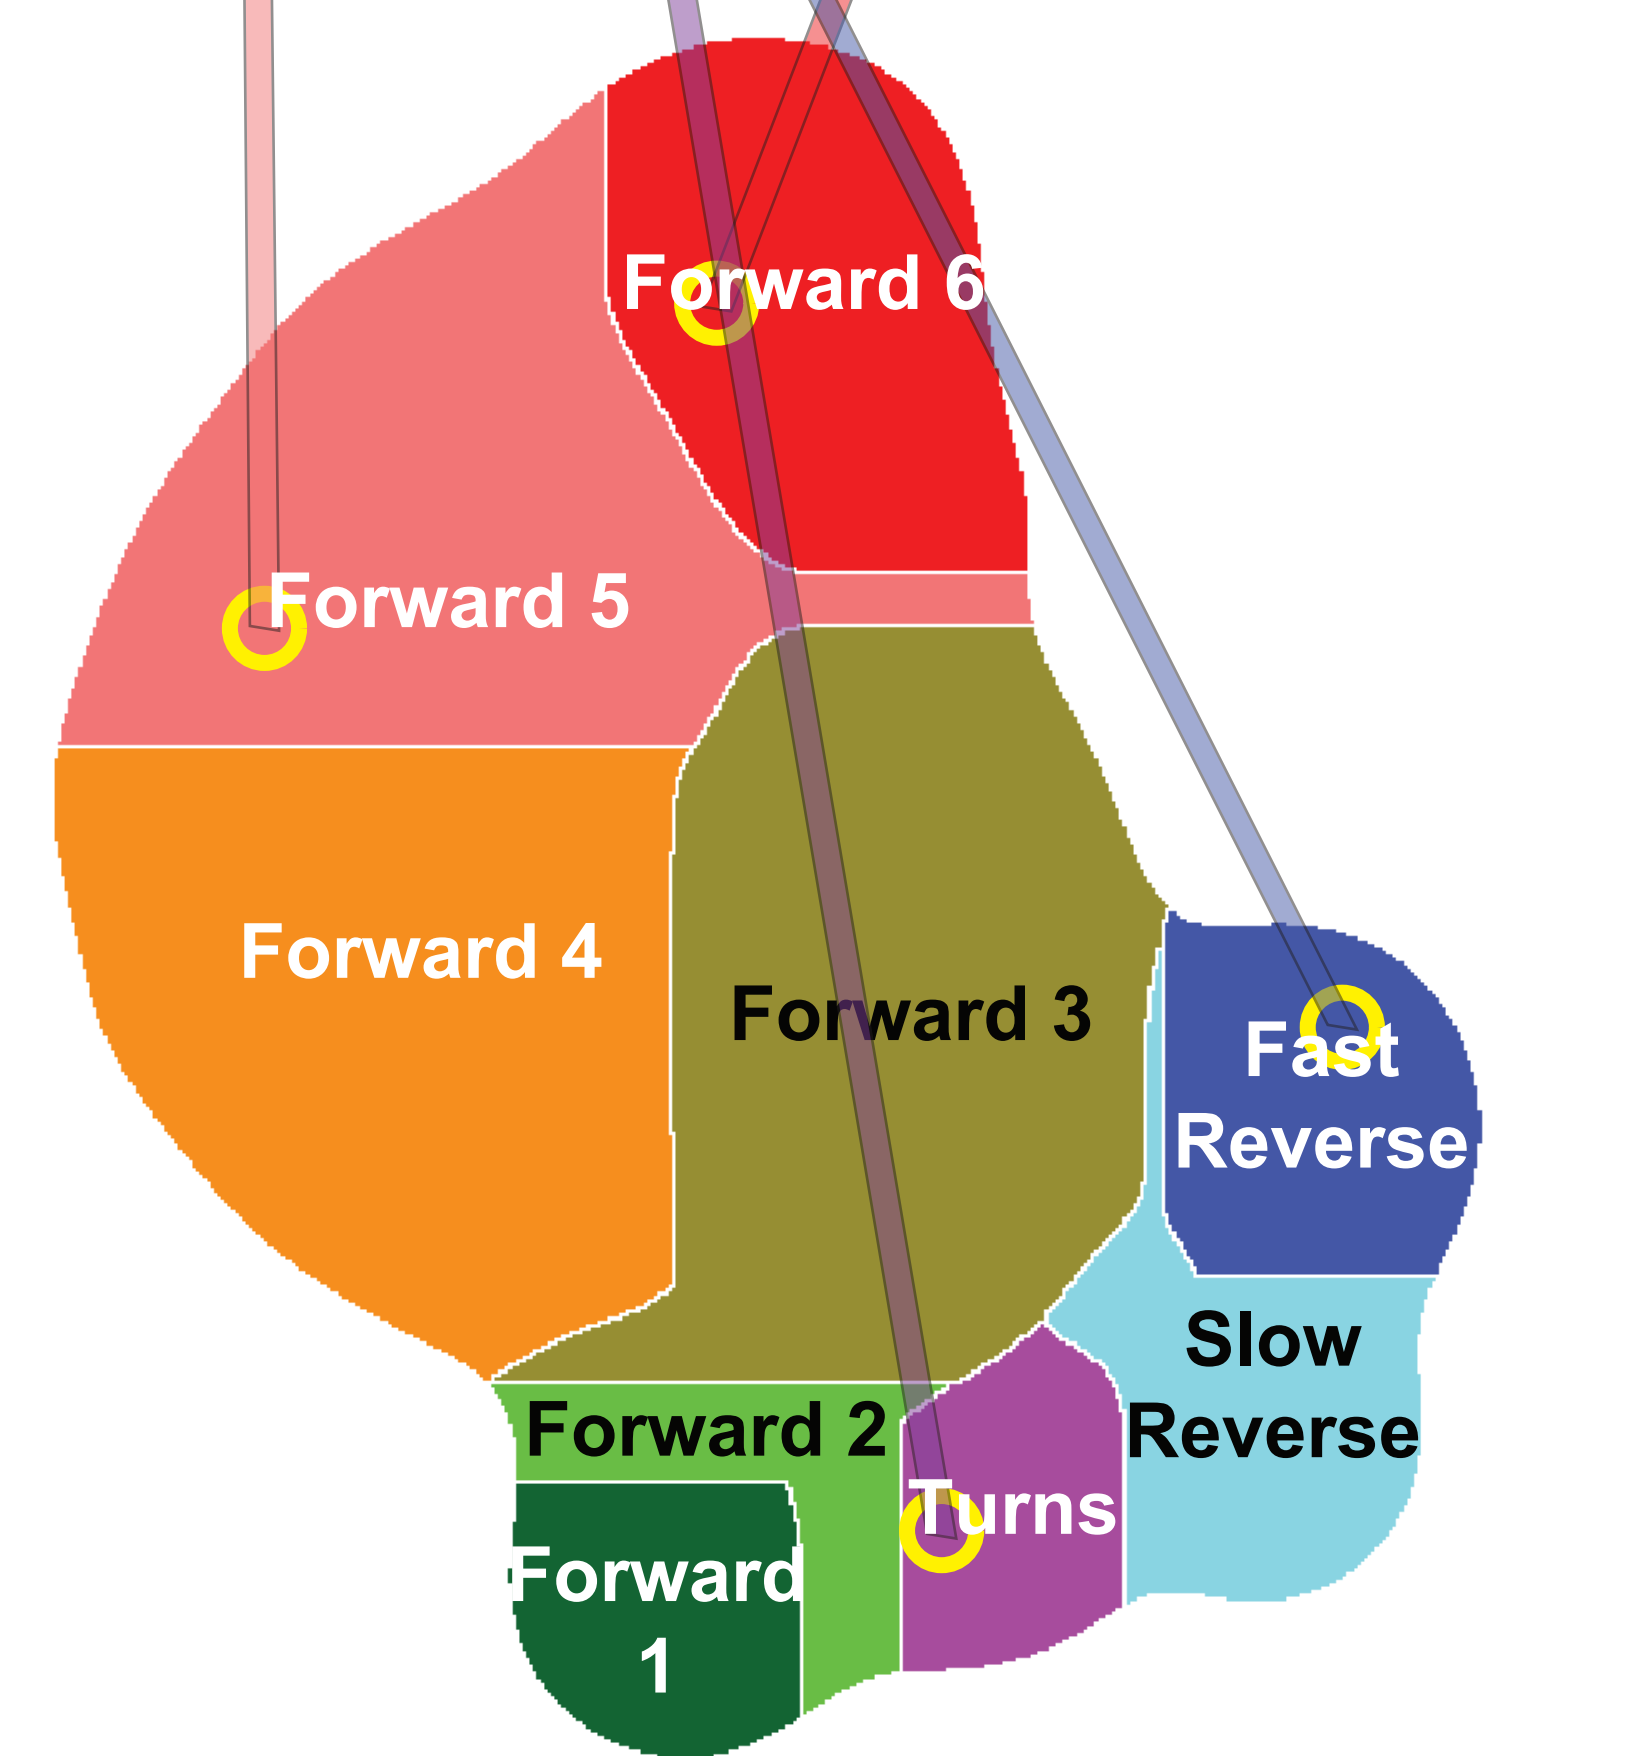

## Behavioral Map

Supplement: supp [file elife-36419-supp-v1.zip › elife_poa_e36419_Figure_1_figure_supplement_1.pdf]

Behavior-Triggered Average  
(Linear kernel)

Non-linearity

Behavior

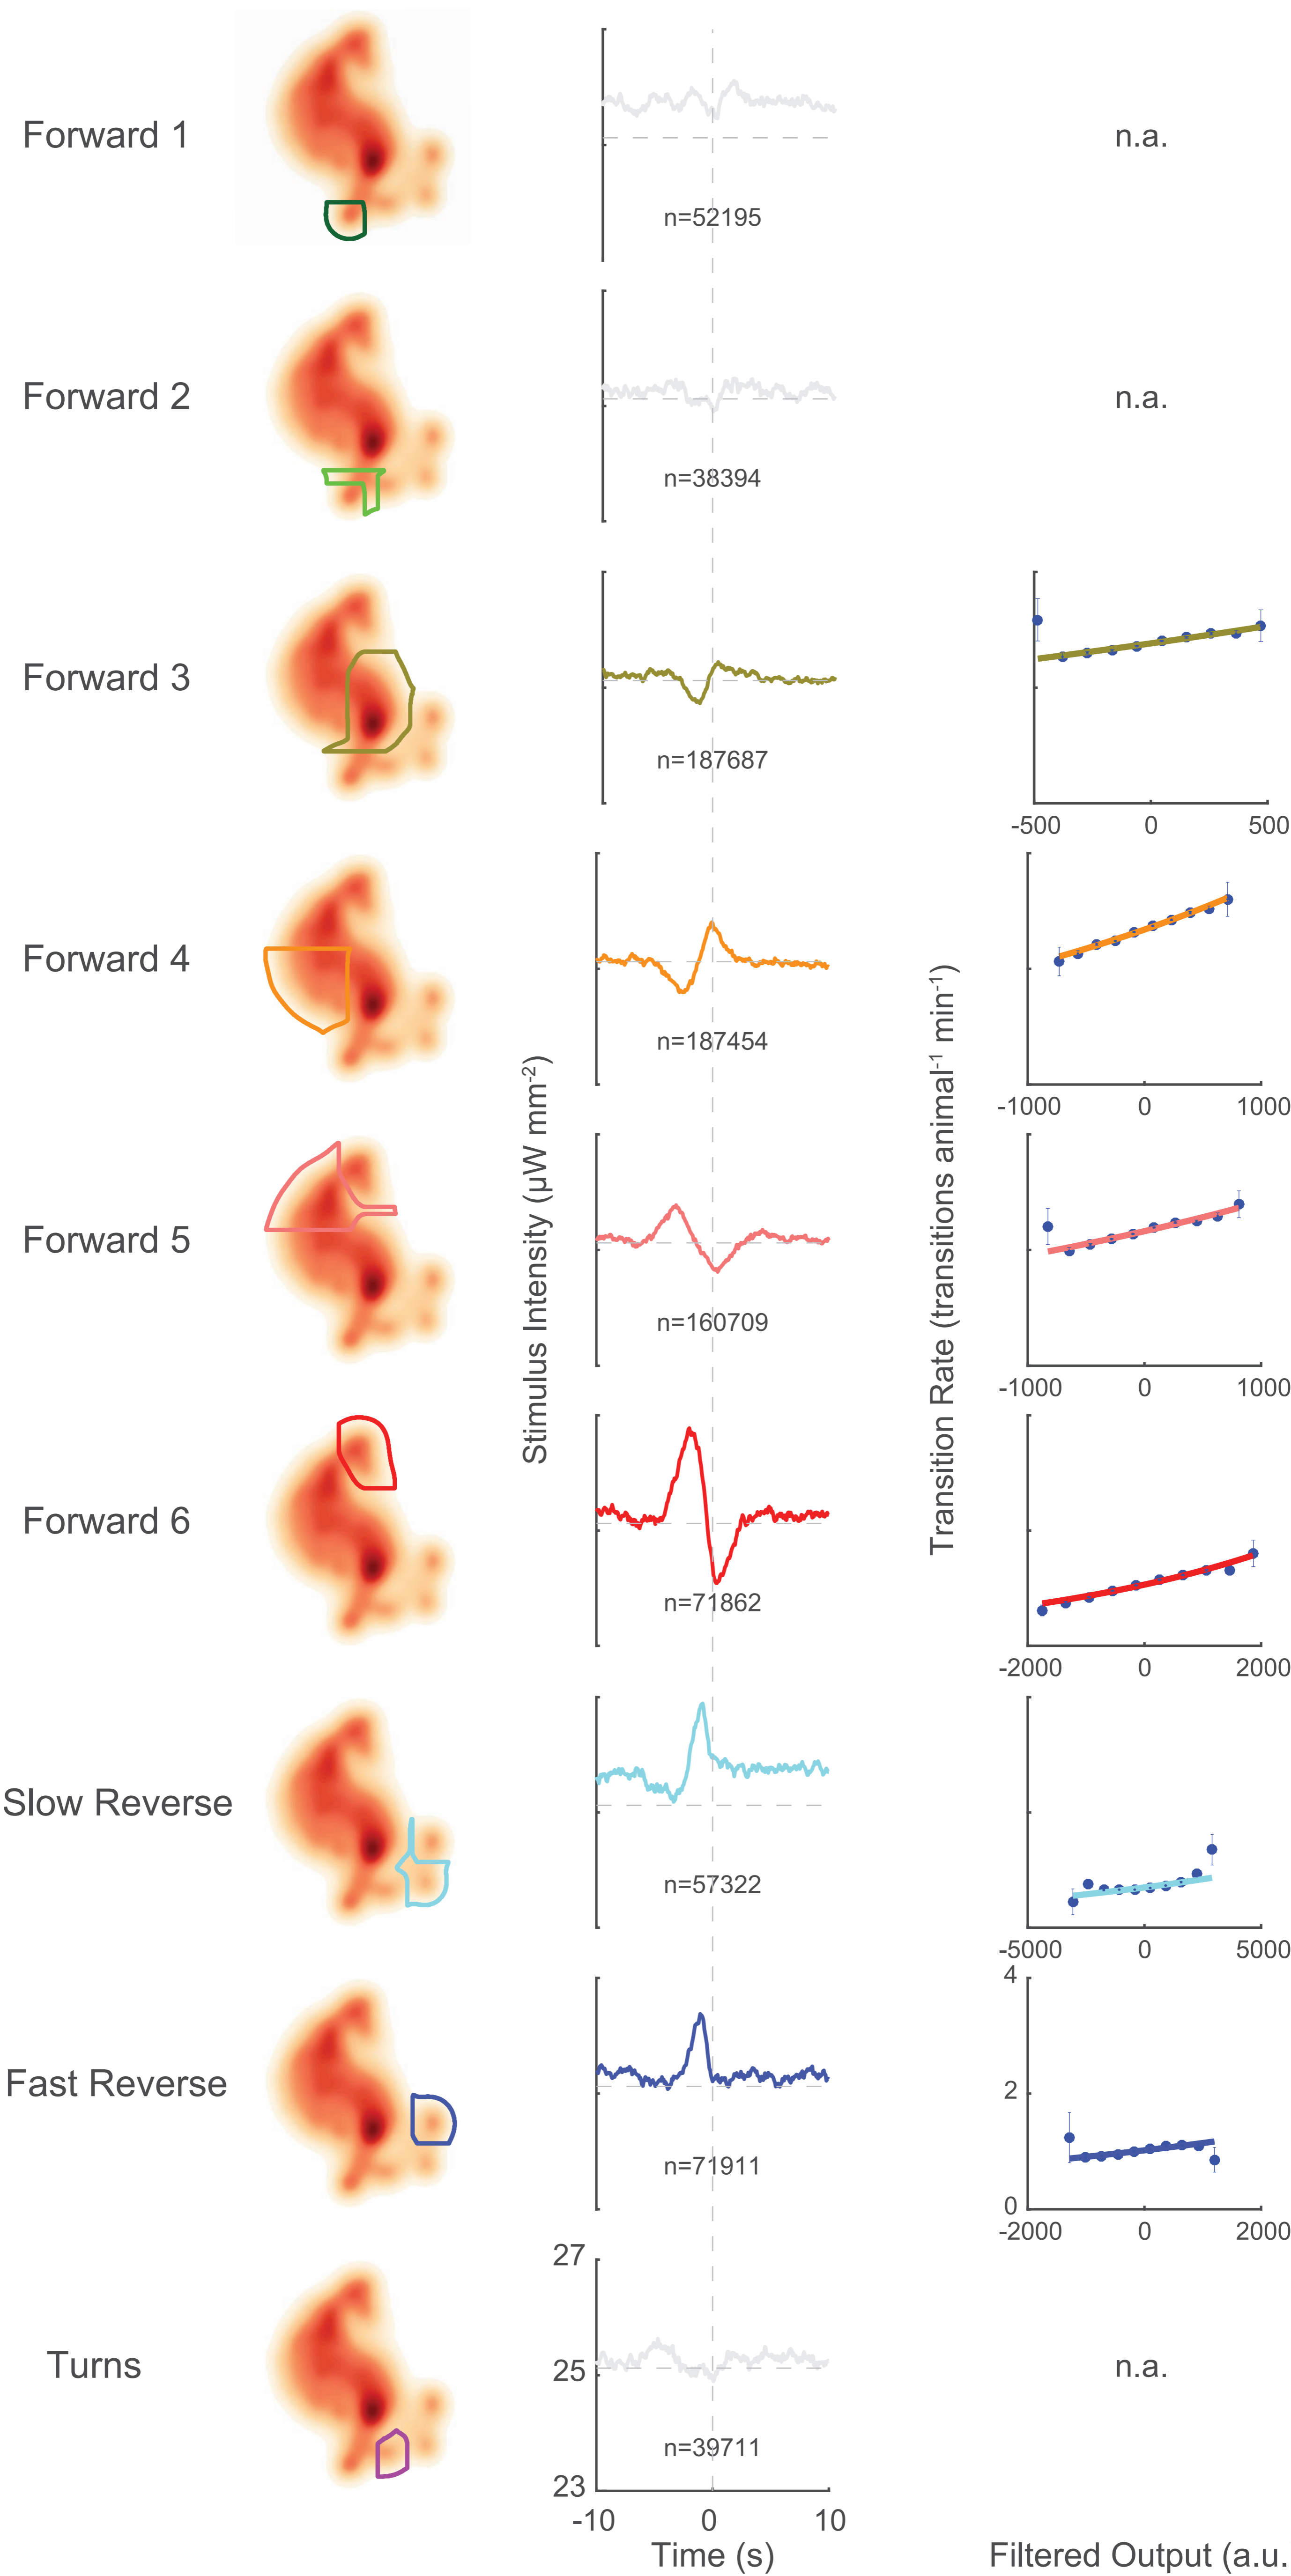

Supplement: supp [file elife-36419-supp-v1.zip › elife_poa_e36419_Figure_3_figure_supplement_2.pdf]

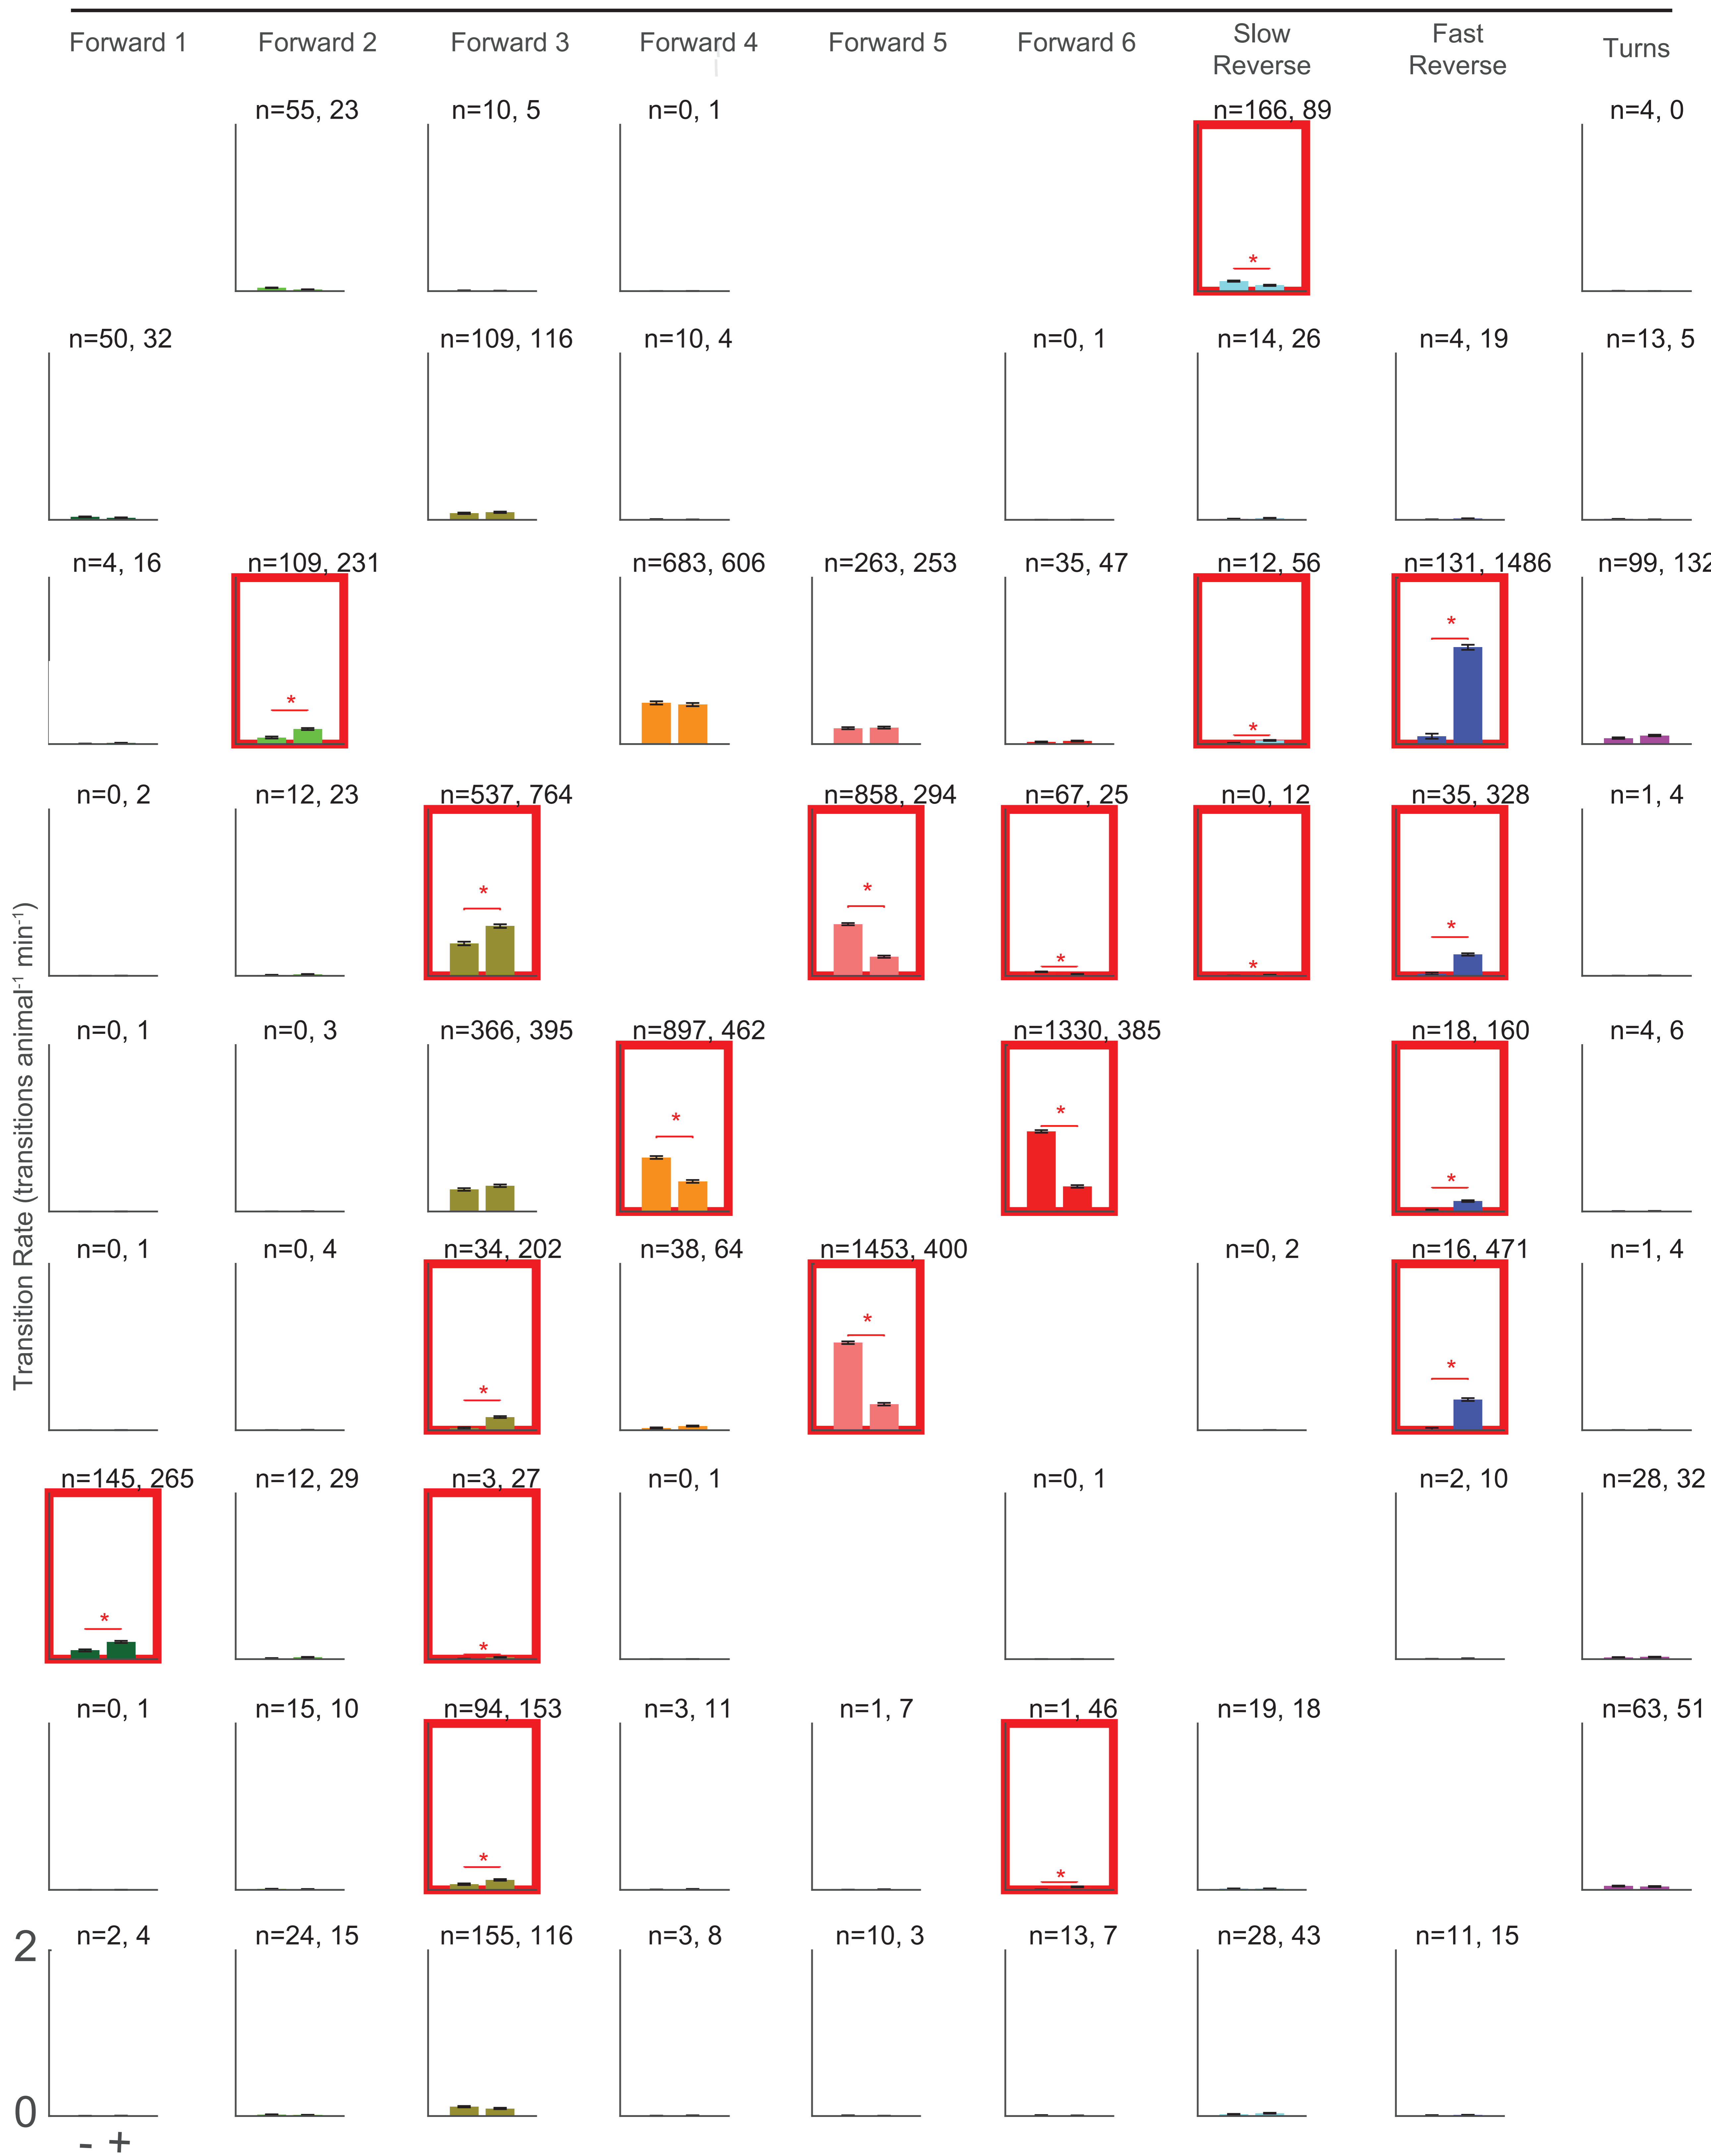

Supplement: supp [file elife-36419-supp-v1.zip › elife_poa_e36419_Figure_8_figure_supplement_2.pdf]

# Occupancy change between random noise stimulation and control

1,784 (stim) and 500 (control) animal-hours

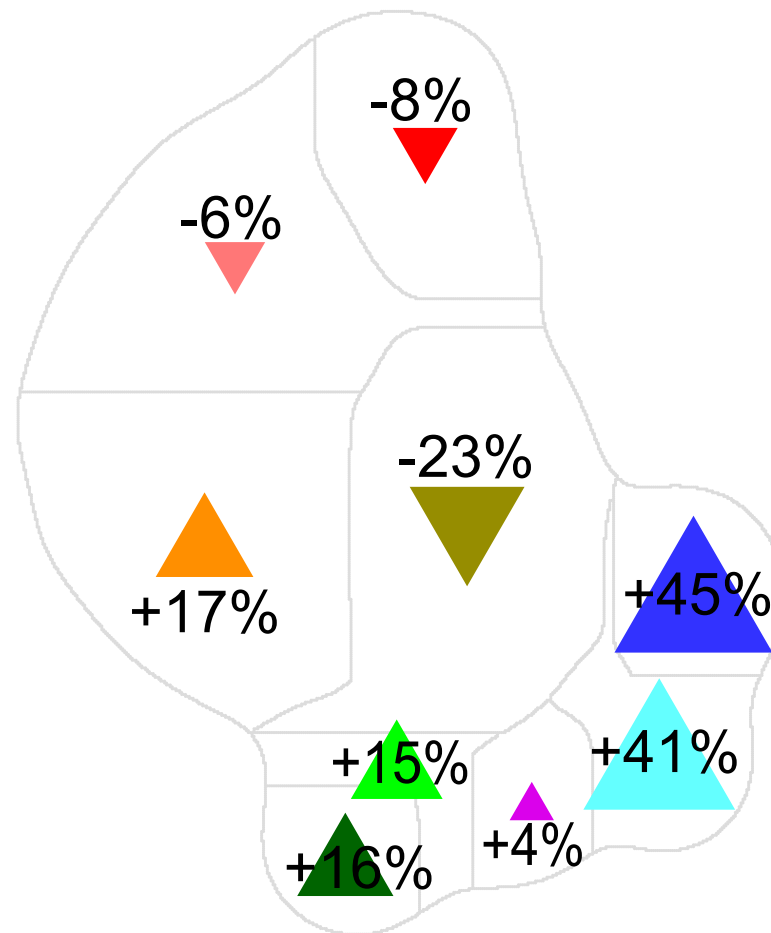

Supplement: supp [file elife-36419-supp-v1.zip › elife_poa_e36419_Figure_3_figure_supplement_1.pdf]

Appears in:

Figure 6

Figure 8

## Transition Into

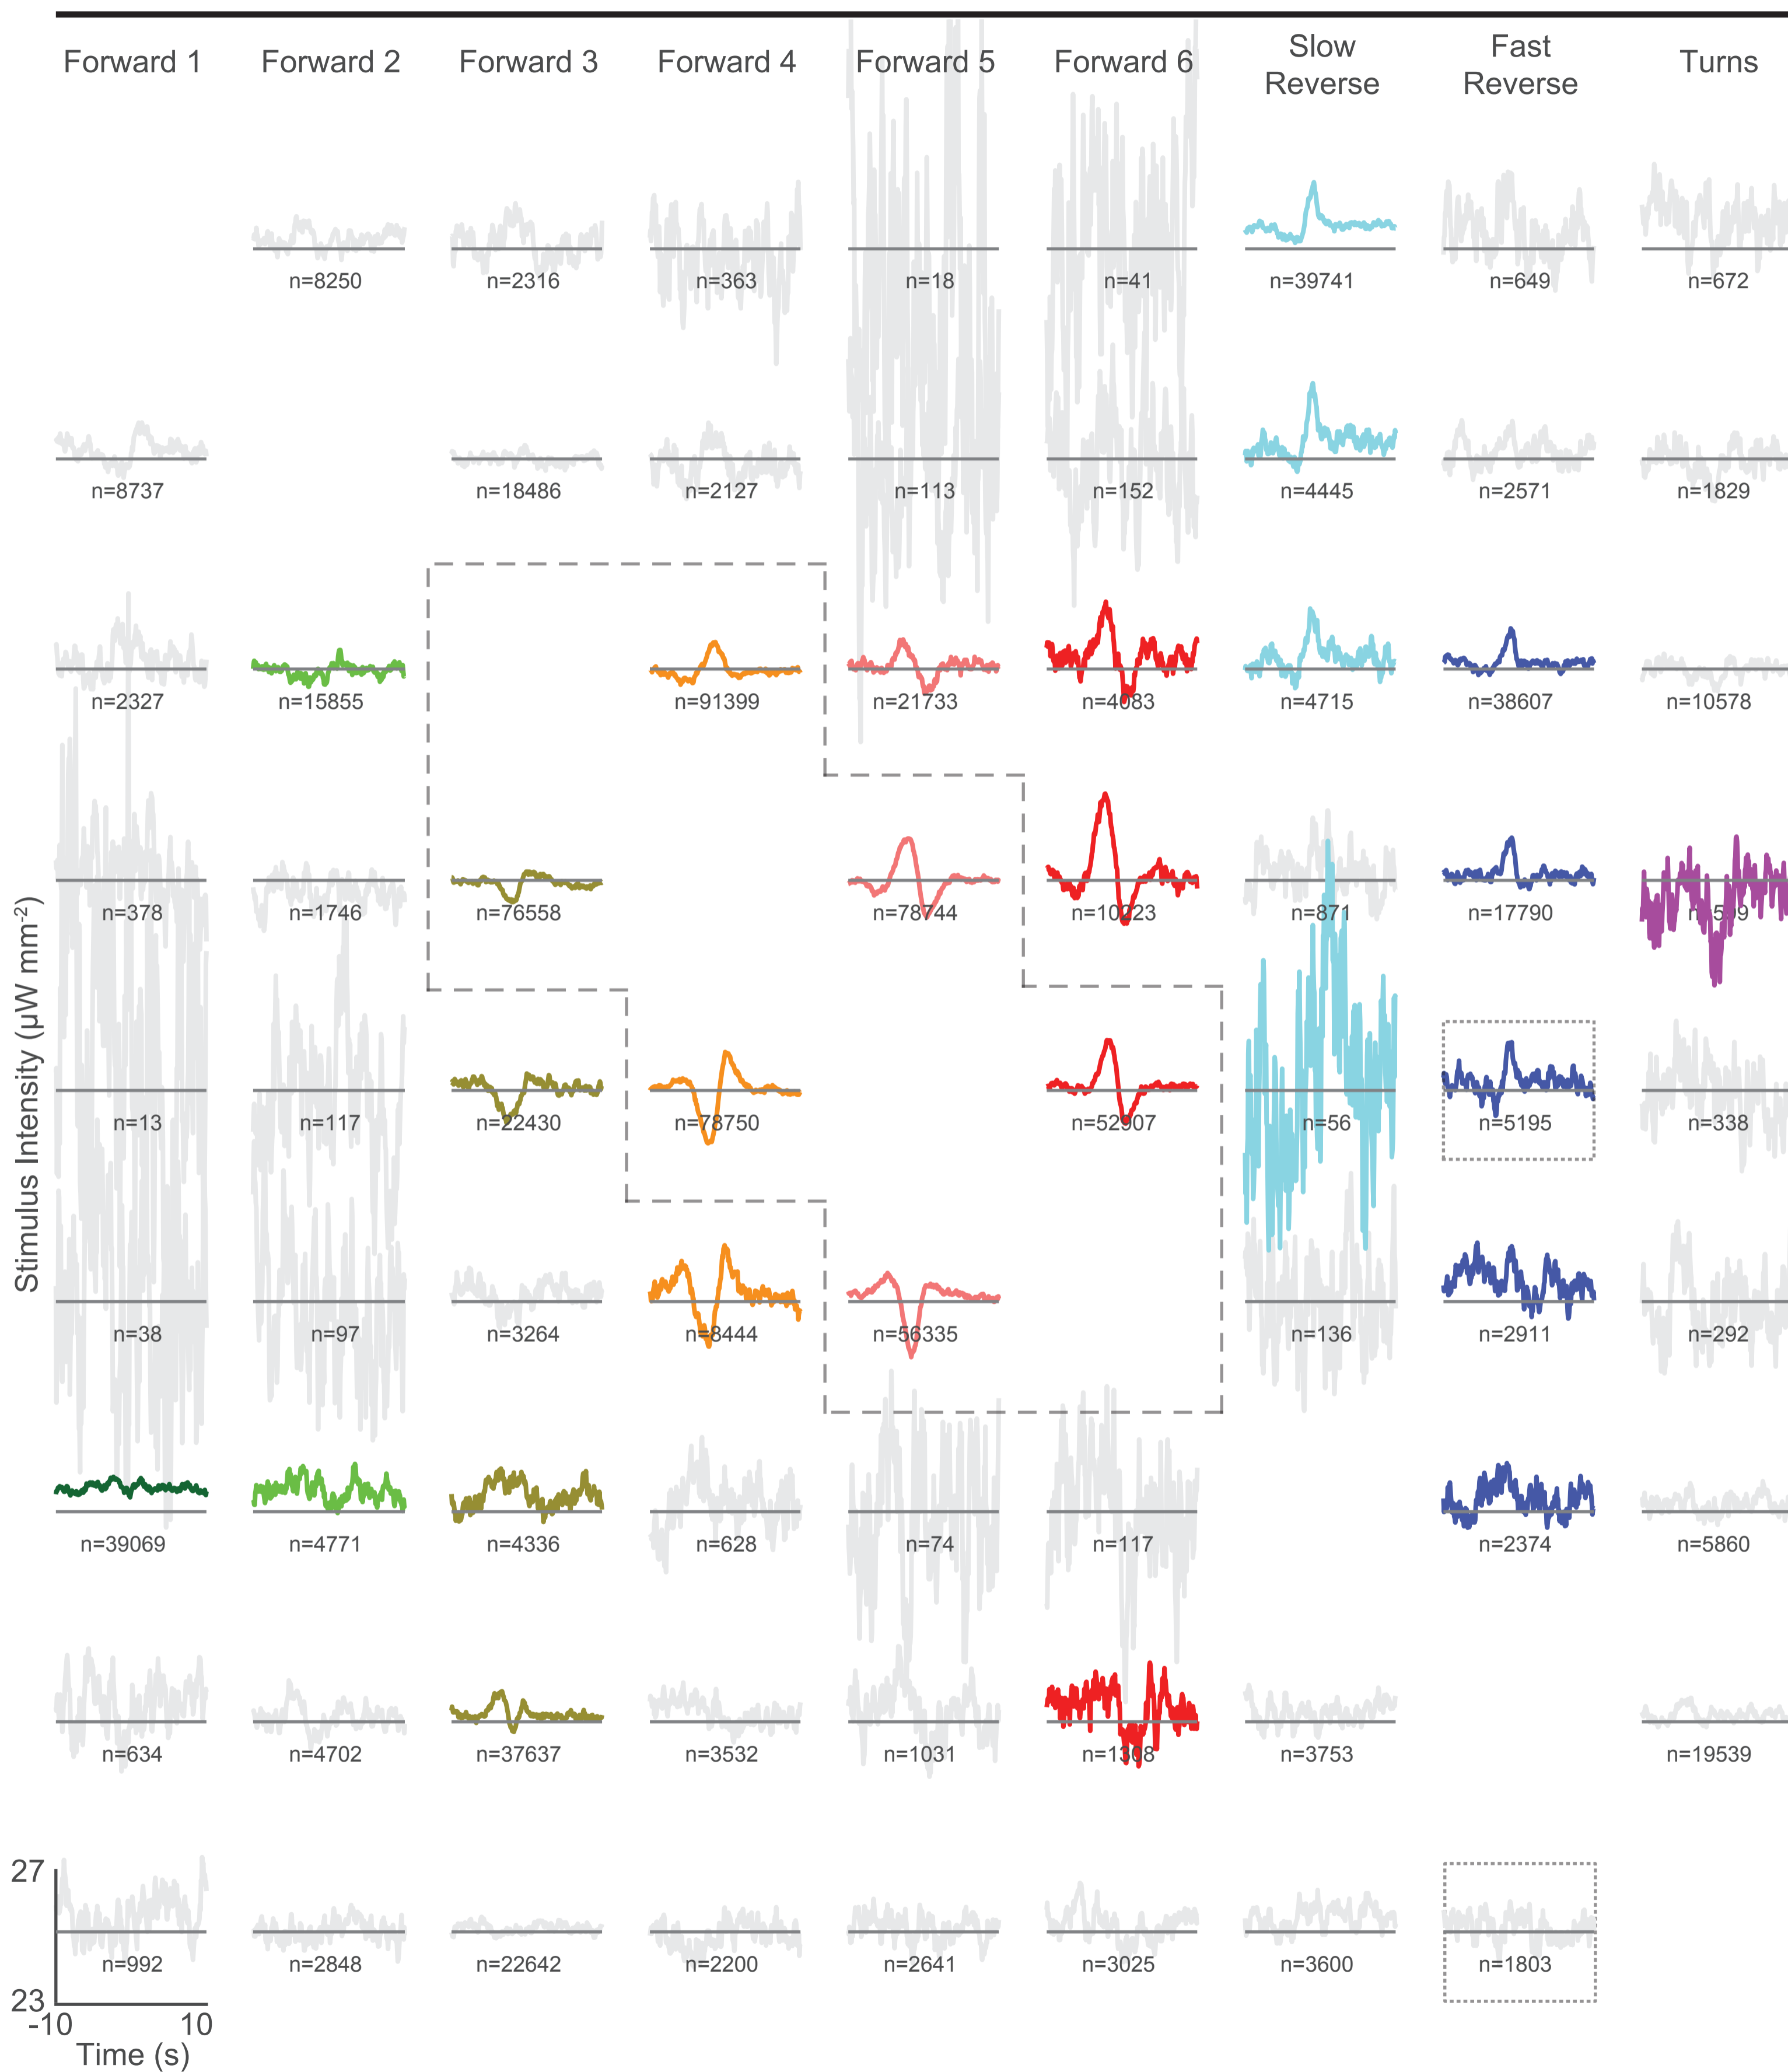

Supplement: supp [file elife-36419-supp-v1.zip › elife_poa_e36419_Figure_6_figure_supplement_1.pdf]

# Light Control (- ATR)

(1,329 stimulus-animal presentations)

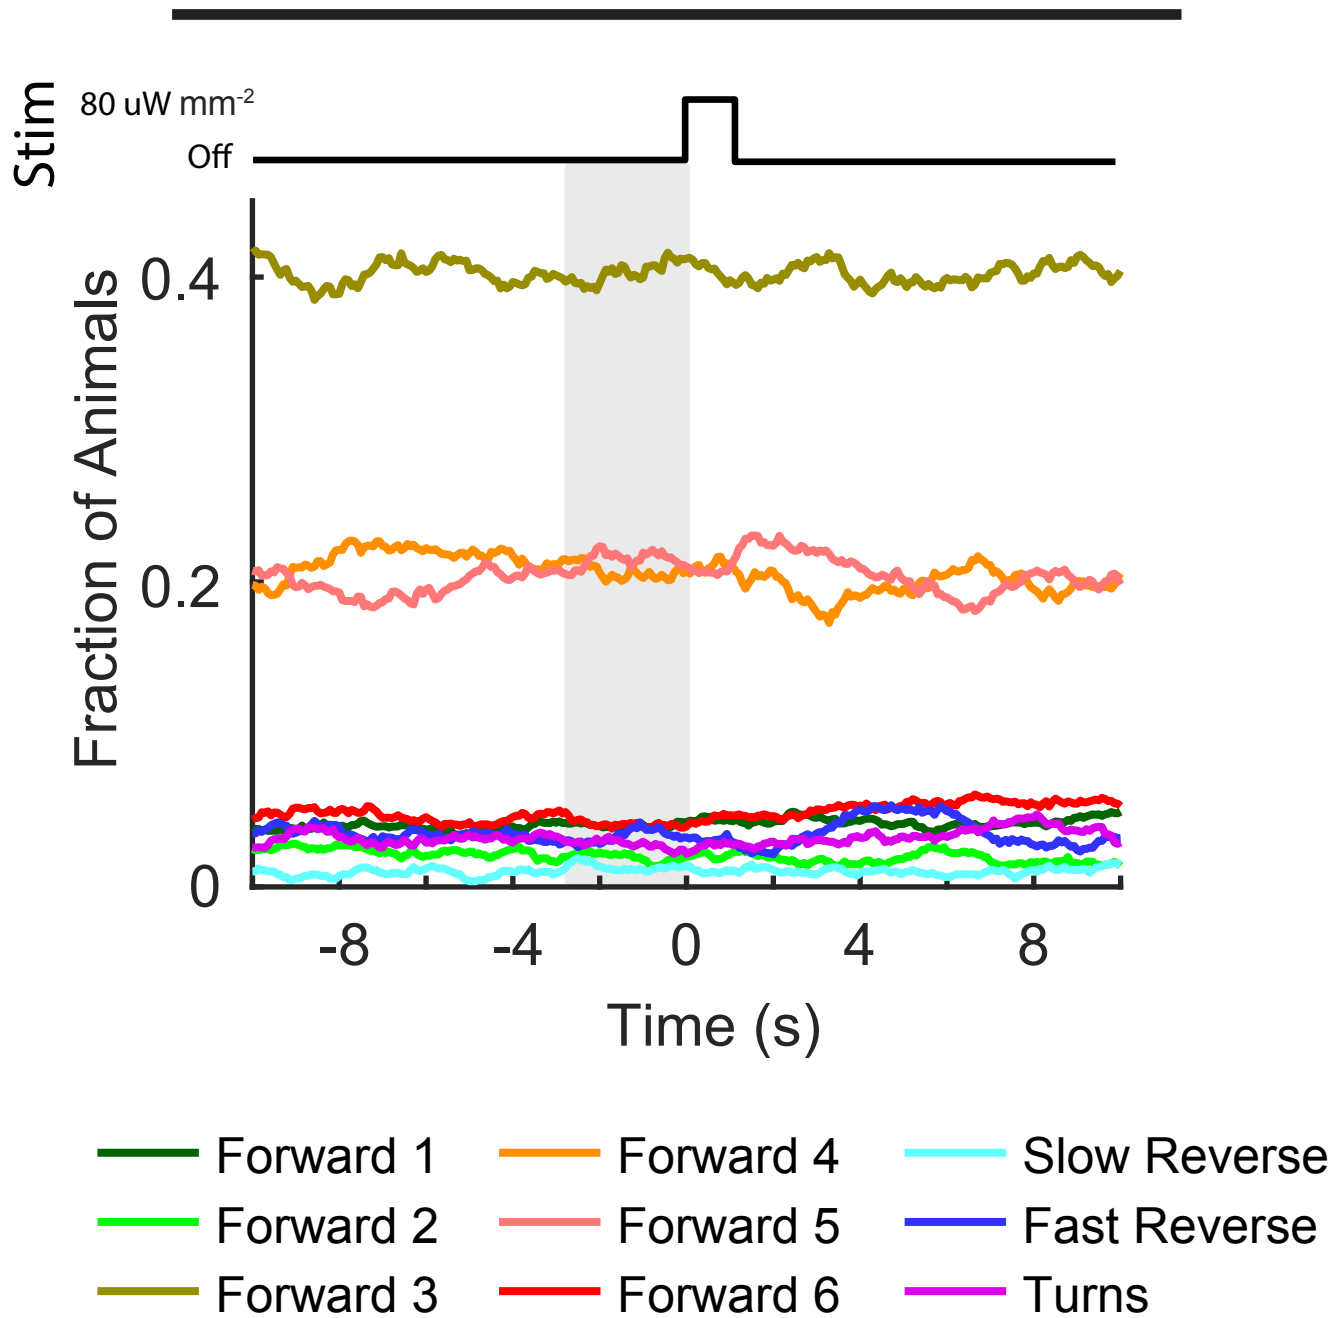

Supplement: supp [file elife-36419-supp-v1.zip › elife_poa_e36419_Figure_2_figure_supplement_3.pdf]

# Light Control (- ATR)

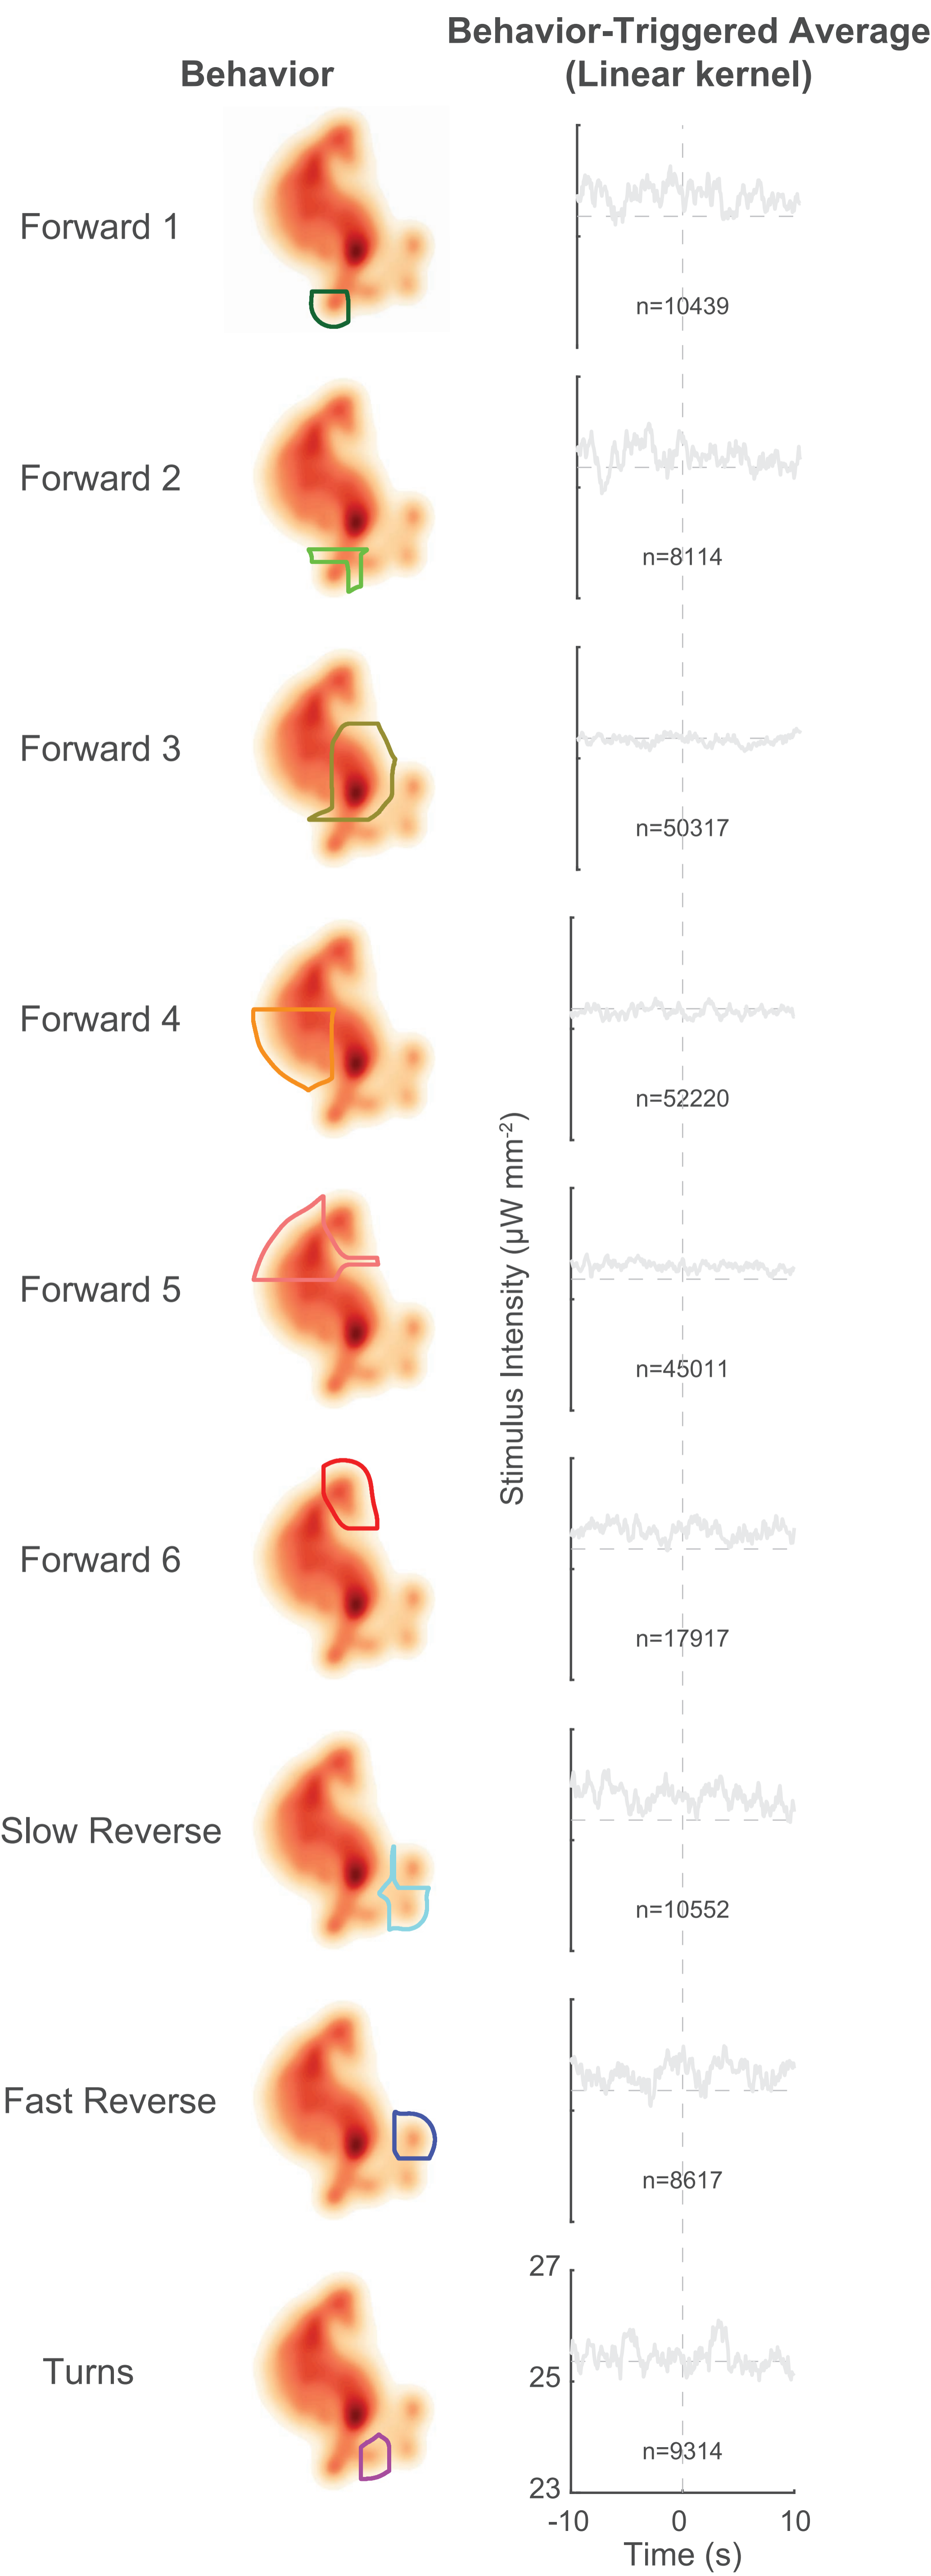

Supplement: supp [file elife-36419-supp-v1.zip › elife_poa_e36419_Figure_3_figure_supplement_3.pdf]

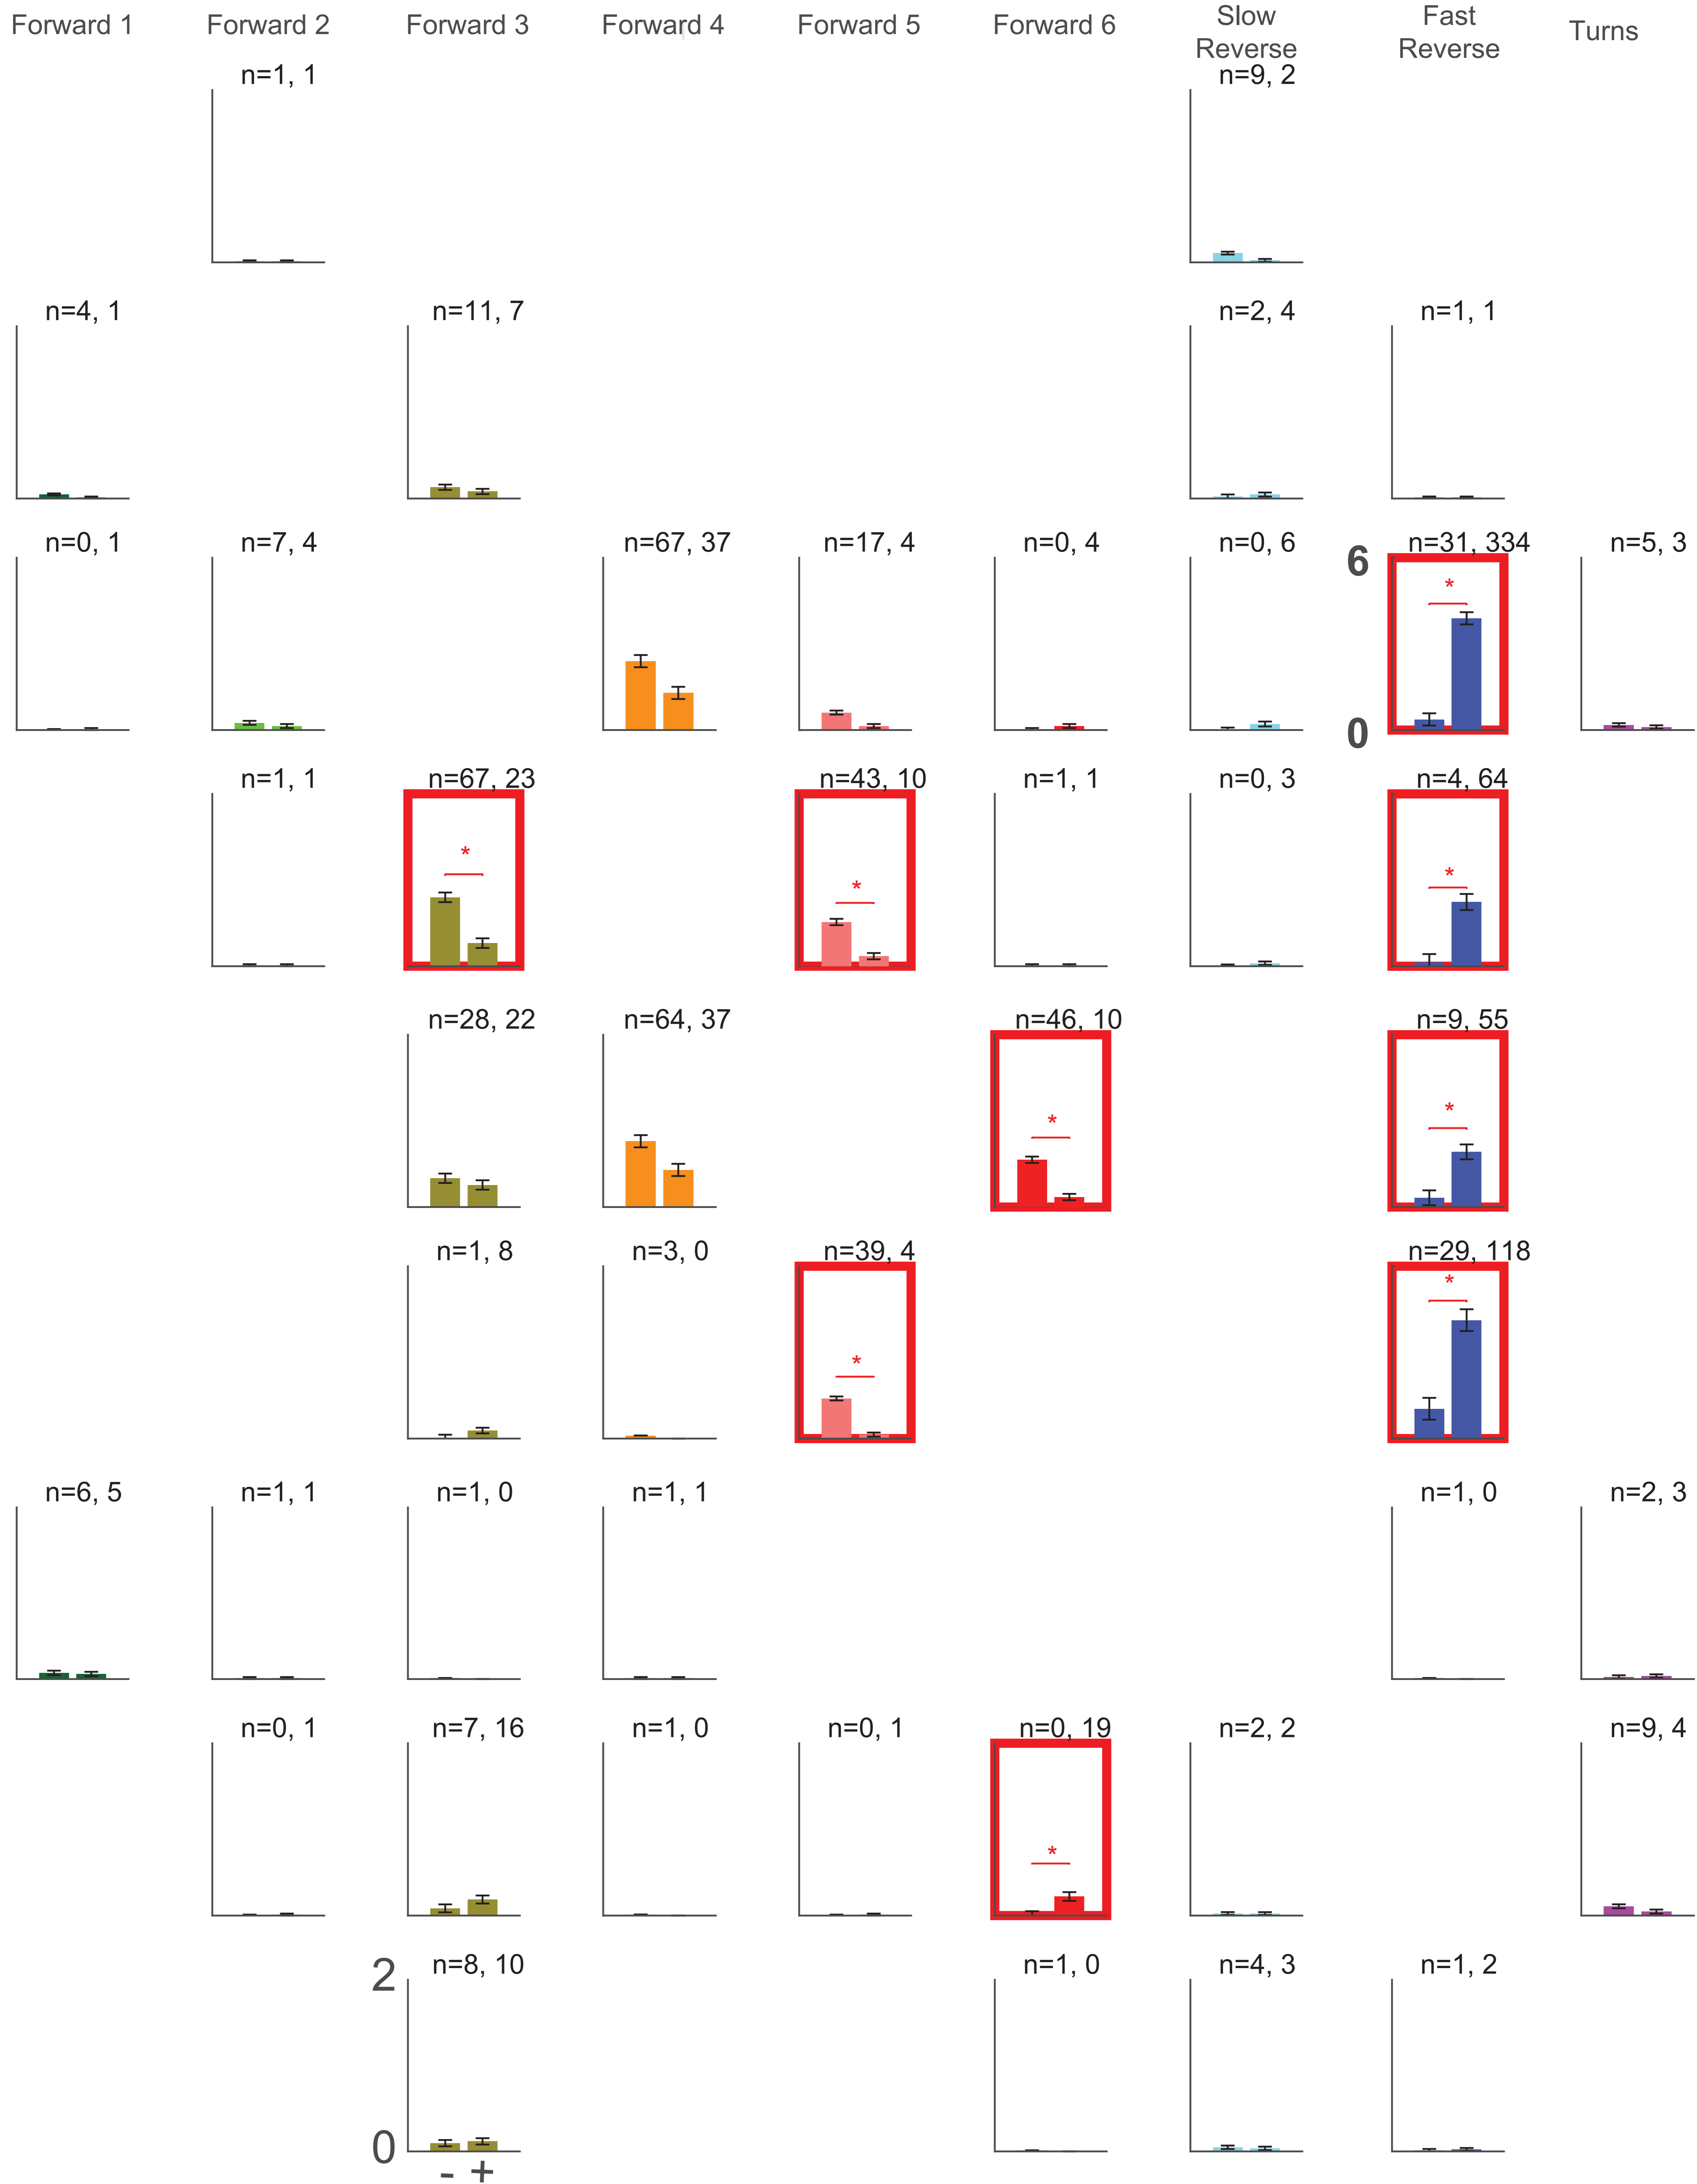

Supplement: supp [file elife-36419-supp-v1.zip › elife_poa_e36419_Figure_8_figure_supplement_1.pdf]
